# Supplementary material for: Adaptive metrics for an evolving pandemic: A dynamic approach to area-level COVID-19 risk designations
Source: PubMed Central journal article supplement — Proc Natl Acad Sci U S A. 2023 Aug 1;120(32):e2302528120. doi: 10.1073/pnas.2302528120 (PMC10410764; doi:10.1073/pnas.2302528120), 2023-08-01
Supplement: pnas.2302528120.sapp.pdf [file pnas.2302528120.sapp.pdf]

1 **Supporting Information for**

2 **Adaptive metrics for an evolving pandemic**

3 **A dynamic approach to area-level COVID-19 risk designations**

4 **Alyssa Bilinski, Joshua A. Salomon, and Laura Hatfield**

5 **Corresponding Author: Alyssa Bilinski.**

6 **E-mail: [alyssa\\_bilinski@brown.edu](mailto:alyssa_bilinski@brown.edu)**

7 **This PDF file includes:**

8 Supporting text

9 Figs. S1 to S15

10 Tables S1 to S2

11 SI References

## 12 Supporting Information Text

**A. Population-Weighted Performance.** Let  $S_i$  be the population of location  $i$ . The weight for location  $i$  is  $\omega_i = \frac{S_i}{\sum_{i=1}^N S_i}$ . To population-weight our accuracy measure, we estimate:

$$\delta_{wt} = 1 - \sum_i \omega_i (p_{FP} w_P + p_{FN} w_N)$$

**B. Optimal Threshold Selection.** We first specify a weight  $wt$  such that we consider false positives to be a factor of  $wt$  as costly as false negatives. For example, if  $wt = 3$ , we consider 3 false positives as costly as 1 false negative; 2 false positives would be less costly than 1 false negative. Denote the probability that an outcome of interest occurs given observed indicators for an observation,  $q_{i,w+3} = Pr(Y_{i,w+3} = 1|X_i)$ . We want to predict that the outcome will occur if, in expectation, triggering a response will decrease net costs. If an observation with probability  $q_{i,w+3}$  is classified with a prediction of 0, this has probability  $q_{i,w+3}$  of being a false negative. If it is classified with a prediction of 1, there is a probability  $1 - q_{i,w+3}$  of a false positive. We therefore should classify with a prediction of 1 if:

$$\begin{aligned} \text{Expected cost of FP} &\leq \text{Expected cost of FN} \\ (1 - q_{i,t+3}) &\leq q_{i,t+3} wt \\ q_{i,t+3} &\geq \frac{1}{1 + wt} \end{aligned}$$

**C. Simulations.** To conduct simulations, we generate data that assumes a the following relationship between the probability of a high outcome,  $Pr(Y_{i,w+3})$ , and a synthetic hospitalization indicator,  $X_{H,i,w}$ :

$$\text{logit}(Pr(Y_{i,w+3} = 1)) = \beta_0 + \beta_1 X_{H,i,w}, \quad [1]$$

We then draw  $Y_{i,w+3}$  from a binomial distribution with the corresponding probability. We vary simulations across 2 dimensions:

1. **Relationship between inputs and outputs:** The optimal cutoff for a metric with neutral weighting is  $\frac{\text{logit}(0.5) - \beta_0}{\beta_1} = \frac{-\beta_0}{\beta_1}$ . We vary this over time as displayed in Figure S13:
  - (a) Constant: 10 hospitalizations per 100,000 population
  - (b) Linear increase: linearly increasing from 5 to 15 hospitalizations per 100,000 over the study period
  - (c) Logistic increase: increasing from 5 to 15 hospitalizations per 100,000 over the study period per a logistic model with a sharp increase at week 25
  - (d) Non-monotonic: optimal cutoff increases to 15 and then decreases
2. **Prevalence of “high” outcomes:** We first use empirical hospitalization data for simulations, drawing synthetic outcomes according to 1. To build intuition, we then use two stylized scenarios, one in which prevalence is constant over quarters and one in which waves are even more pronounced.
  - (a) Empirical: We use true state-level hospitalization data from Q3 2021 through Q3 2022.
  - (b) Constant: We draw  $X_{H,i,w}$  from a  $Unif(2, 20)$  distribution for state-times from Q3 2021 through Q3 2022.
  - (c) Sharp waves: We alternate each quarter between drawing hospitalizations from a  $N(5, 1)$  distribution and a  $N(15, 1)$  distribution for each state-time from Q3 2021 through Q3 2022.

For illustration, we set  $\beta_0 = -3c$  and  $\beta_1 = 3$  and use the first quarter (synthetic Q3 2021) as training data. For each scenario, we simulate 50 draws. As in the main text, we select the best-performing static metric during training data and compare performance in terms of predictive accuracy to adaptive metrics, averaging over draws. Results are displayed in Figure S14.

**D. Comparison to CDC Community Levels Performance.** In the published evaluation of the performance of CDC’s Community Levels, the risk designation is considered a true positive if, for two counties with different Community Levels, the county with the higher level had the more severe outcome 3 weeks later (1). This values the ordering of two areas’ outcomes as equally important everywhere, whereas our methods prioritize correctly classifying areas on either side of the a priori-specified threshold (e.g., 1 death/100k/week).

Although these are not directly comparable to our measures, we compared our results to the CDC’s own published evaluation of the performance of Community Levels (1). These analyses use data from 3/1/2021 to 1/24/2022 to compute the area under the receiver operator curve (AUROC) for Community Levels (comparing High versus Medium/Low) for mortality at 0.71. During approximately the same period (Q2-Q4 2021, which is our training period), we found that Community Levels had unweighted accuracy of 0.67 for predicting  $>1$  death/100k/week and 0.80 for  $>2$  deaths/100k/week at the county level,

49 falling on either side of the AUROC value. We obtained similar estimates for accuracy compared to AUROC estimates of bed  
50 occupancy (0.86 CDC AUROC vs. 0.84 accuracy for predicting >10%), but lower estimates for ICU admissions (0.82 CDC  
51 AUROC vs. 0.66 accuracy for predicting >2 ICU hospitalizations/100k/week), which may reflect our choice of a lower cutoff as  
52 most policy-relevant, but with stronger Community Levels performance at higher cutoff values.

**Table S1. Optimal cutoffs for static metrics. Static metrics designated an area as high-risk if all included indicators exceeded their respective optimal thresholds from the training period (4/1/2021-12/31/2021). This table lists optimal cutoffs for each level of geography, risk preference, outcome, and indicator combination. Cutoffs are listed in the order CHO, i.e. 0 5 0 means a cutoff of greater than or equal to 0 per 100K for cases, 5 per 100K for hospitalizations, and 0% inpatient bed occupancy. When an indicator is excluded from a particular functional form, it takes the cutoff 0 by default.**

| Geography | Risk preference                  | Outcome           | Indicators | Optimal training cutoff |
|-----------|----------------------------------|-------------------|------------|-------------------------|
| States    | Neutral                          | >1 death/100K/wk  | H          | 0 5 0                   |
| States    | Neutral                          | >1 death/100K/wk  | HO         | 0 5 5                   |
| States    | Neutral                          | >1 death/100K/wk  | C          | 50 0 0                  |
| States    | Neutral                          | >1 death/100K/wk  | CH         | 50 5 0                  |
| States    | Neutral                          | >1 death/100K/wk  | CHO        | 50 5 5                  |
| States    | Neutral                          | >2 deaths/100K/wk | H          | 0 15 0                  |
| States    | Neutral                          | >2 deaths/100K/wk | HO         | 0 15 5                  |
| States    | Neutral                          | >2 deaths/100K/wk | C          | 200 0 0                 |
| States    | Neutral                          | >2 deaths/100K/wk | CH         | 200 5 0                 |
| States    | Neutral                          | >2 deaths/100K/wk | CHO        | 200 5 5                 |
| States    | Don't cry wolf (0.5x FN)         | >1 death/100K/wk  | H          | 0 10 0                  |
| States    | Don't cry wolf (0.5x FN)         | >1 death/100K/wk  | HO         | 0 5 5                   |
| States    | Don't cry wolf (0.5x FN)         | >1 death/100K/wk  | C          | 100 0 0                 |
| States    | Don't cry wolf (0.5x FN)         | >1 death/100K/wk  | CH         | 100 5 0                 |
| States    | Don't cry wolf (0.5x FN)         | >1 death/100K/wk  | CHO        | 50 5 5                  |
| States    | Don't cry wolf (0.5x FN)         | >2 deaths/100K/wk | H          | 0 15 0                  |
| States    | Don't cry wolf (0.5x FN)         | >2 deaths/100K/wk | HO         | 0 15 5                  |
| States    | Don't cry wolf (0.5x FN)         | >2 deaths/100K/wk | CH         | 150 15 0                |
| States    | Don't cry wolf (0.5x FN)         | >2 deaths/100K/wk | C          | 200 0 0                 |
| States    | Don't cry wolf (0.5x FN)         | >2 deaths/100K/wk | CHO        | 200 10 5                |
| States    | Better safe than sorry (0.5x FP) | >1 death/100K/wk  | H          | 0 5 0                   |
| States    | Better safe than sorry (0.5x FP) | >1 death/100K/wk  | HO         | 0 5 5                   |
| States    | Better safe than sorry (0.5x FP) | >1 death/100K/wk  | C          | 50 0 0                  |
| States    | Better safe than sorry (0.5x FP) | >1 death/100K/wk  | CH         | 50 5 0                  |
| States    | Better safe than sorry (0.5x FP) | >1 death/100K/wk  | CHO        | 50 5 5                  |
| States    | Better safe than sorry (0.5x FP) | >2 deaths/100K/wk | H          | 0 10 0                  |
| States    | Better safe than sorry (0.5x FP) | >2 deaths/100K/wk | HO         | 0 10 5                  |
| States    | Better safe than sorry (0.5x FP) | >2 deaths/100K/wk | C          | 150 0 0                 |
| States    | Better safe than sorry (0.5x FP) | >2 deaths/100K/wk | CH         | 150 10 0                |
| States    | Better safe than sorry (0.5x FP) | >2 deaths/100K/wk | CHO        | 150 5 5                 |
| HSAs      | Neutral                          | >1 death/100K/wk  | H          | 0 5 0                   |
| HSAs      | Neutral                          | >1 death/100K/wk  | HO         | 0 5 5                   |
| HSAs      | Neutral                          | >1 death/100K/wk  | C          | 50 0 0                  |
| HSAs      | Neutral                          | >1 death/100K/wk  | CH         | 50 5 0                  |
| HSAs      | Neutral                          | >1 death/100K/wk  | CHO        | 50 5 5                  |
| HSAs      | Neutral                          | >2 deaths/100K/wk | H          | 0 15 0                  |
| HSAs      | Neutral                          | >2 deaths/100K/wk | HO         | 0 15 5                  |
| HSAs      | Neutral                          | >2 deaths/100K/wk | CH         | 150 10 0                |
| HSAs      | Neutral                          | >2 deaths/100K/wk | CHO        | 150 10 5                |
| HSAs      | Neutral                          | >2 deaths/100K/wk | C          | 200 0 0                 |
| HSAs      | Don't cry wolf (0.5x FN)         | >1 death/100K/wk  | H          | 0 10 0                  |
| HSAs      | Don't cry wolf (0.5x FN)         | >1 death/100K/wk  | HO         | 0 5 5                   |
| HSAs      | Don't cry wolf (0.5x FN)         | >1 death/100K/wk  | C          | 100 0 0                 |
| HSAs      | Don't cry wolf (0.5x FN)         | >1 death/100K/wk  | CH         | 100 5 0                 |
| HSAs      | Don't cry wolf (0.5x FN)         | >1 death/100K/wk  | CHO        | 50 5 5                  |
| HSAs      | Don't cry wolf (0.5x FN)         | >2 deaths/100K/wk | H          | 0 15 0                  |
| HSAs      | Don't cry wolf (0.5x FN)         | >2 deaths/100K/wk | HO         | 0 15 5                  |
| HSAs      | Don't cry wolf (0.5x FN)         | >2 deaths/100K/wk | CHO        | 150 15 5                |
| HSAs      | Don't cry wolf (0.5x FN)         | >2 deaths/100K/wk | CH         | 200 15 0                |
| HSAs      | Don't cry wolf (0.5x FN)         | >2 deaths/100K/wk | C          | 250 0 0                 |
| HSAs      | Better safe than sorry (0.5x FP) | >1 death/100K/wk  | H          | 0 5 0                   |
| HSAs      | Better safe than sorry (0.5x FP) | >1 death/100K/wk  | HO         | 0 5 5                   |
| HSAs      | Better safe than sorry (0.5x FP) | >1 death/100K/wk  | C          | 50 0 0                  |
| HSAs      | Better safe than sorry (0.5x FP) | >1 death/100K/wk  | CH         | 50 5 0                  |
| HSAs      | Better safe than sorry (0.5x FP) | >1 death/100K/wk  | CHO        | 50 5 5                  |

|          |                                  |                   |     |          |
|----------|----------------------------------|-------------------|-----|----------|
| HSAs     | Better safe than sorry (0.5x FP) | >2 deaths/100K/wk | H   | 0 10 0   |
| HSAs     | Better safe than sorry (0.5x FP) | >2 deaths/100K/wk | HO  | 0 10 5   |
| HSAs     | Better safe than sorry (0.5x FP) | >2 deaths/100K/wk | CH  | 100 10 0 |
| HSAs     | Better safe than sorry (0.5x FP) | >2 deaths/100K/wk | CHO | 100 5 5  |
| HSAs     | Better safe than sorry (0.5x FP) | >2 deaths/100K/wk | C   | 150 0 0  |
| Counties | Neutral                          | >1 death/100K/wk  | H   | 0 5 0    |
| Counties | Neutral                          | >1 death/100K/wk  | HO  | 0 5 5    |
| Counties | Neutral                          | >1 death/100K/wk  | C   | 100 0 0  |
| Counties | Neutral                          | >1 death/100K/wk  | CH  | 50 5 0   |
| Counties | Neutral                          | >1 death/100K/wk  | CHO | 50 5 5   |
| Counties | Neutral                          | >2 deaths/100K/wk | H   | 0 15 0   |
| Counties | Neutral                          | >2 deaths/100K/wk | HO  | 0 15 5   |
| Counties | Neutral                          | >2 deaths/100K/wk | CH  | 150 15 0 |
| Counties | Neutral                          | >2 deaths/100K/wk | CHO | 150 15 5 |
| Counties | Neutral                          | >2 deaths/100K/wk | C   | 200 0 0  |
| Counties | Don't cry wolf (0.5x FN)         | >1 death/100K/wk  | H   | 0 10 0   |
| Counties | Don't cry wolf (0.5x FN)         | >1 death/100K/wk  | HO  | 0 5 5    |
| Counties | Don't cry wolf (0.5x FN)         | >1 death/100K/wk  | CH  | 100 10 0 |
| Counties | Don't cry wolf (0.5x FN)         | >1 death/100K/wk  | CHO | 100 5 5  |
| Counties | Don't cry wolf (0.5x FN)         | >1 death/100K/wk  | C   | 150 0 0  |
| Counties | Don't cry wolf (0.5x FN)         | >2 deaths/100K/wk | HO  | 0 15 10  |
| Counties | Don't cry wolf (0.5x FN)         | >2 deaths/100K/wk | H   | 0 20 0   |
| Counties | Don't cry wolf (0.5x FN)         | >2 deaths/100K/wk | CH  | 200 15 0 |
| Counties | Don't cry wolf (0.5x FN)         | >2 deaths/100K/wk | CHO | 200 15 5 |
| Counties | Don't cry wolf (0.5x FN)         | >2 deaths/100K/wk | C   | 250 0 0  |
| Counties | Better safe than sorry (0.5x FP) | >1 death/100K/wk  | H   | 0 5 0    |
| Counties | Better safe than sorry (0.5x FP) | >1 death/100K/wk  | HO  | 0 5 5    |
| Counties | Better safe than sorry (0.5x FP) | >1 death/100K/wk  | C   | 50 0 0   |
| Counties | Better safe than sorry (0.5x FP) | >1 death/100K/wk  | CH  | 50 5 0   |
| Counties | Better safe than sorry (0.5x FP) | >1 death/100K/wk  | CHO | 50 5 5   |
| Counties | Better safe than sorry (0.5x FP) | >2 deaths/100K/wk | H   | 0 10 0   |
| Counties | Better safe than sorry (0.5x FP) | >2 deaths/100K/wk | HO  | 0 10 5   |
| Counties | Better safe than sorry (0.5x FP) | >2 deaths/100K/wk | CH  | 100 10 0 |
| Counties | Better safe than sorry (0.5x FP) | >2 deaths/100K/wk | CHO | 100 10 5 |
| Counties | Better safe than sorry (0.5x FP) | >2 deaths/100K/wk | C   | 150 0 0  |

**Table S2. Switches between high-risk and non-high risk episodes.** We estimated the number of switches between predicted high-risk and non-high risk designations using two definitions: 1) any change from the prior week and 2) a change that lasted at least two weeks (following a previous episode at least two weeks in duration). Across states and counties, we find that best-performing adaptive metrics of those in Figure S4 generally predicted fewer unique episodes than CDC Community Levels, and both often predict fewer episodes were observed, with one exception being the outcome >1 death/100K/week. In this case, adaptive metrics had more episodes, but these were substantially closer than static metrics to the values.

| Geography | Outcome                      | Episode definition | True episodes | Adaptive episodes | Community Level episodes |
|-----------|------------------------------|--------------------|---------------|-------------------|--------------------------|
| State     | >1 death/100K/wk             | 1                  | 707           | 450               | 370                      |
| State     | >1 death/100K/wk             | 2                  | 428           | 309               | 327                      |
| State     | >2 deaths/100K/wk            | 1                  | 447           | 226               | 370                      |
| State     | >2 deaths/100K/wk            | 2                  | 304           | 188               | 327                      |
| State     | >2 ICU patients/100K/wk      | 1                  | 280           | 319               | 370                      |
| State     | >2 ICU patients/100K/wk      | 2                  | 236           | 254               | 327                      |
| State     | >10% inpatient bed occupancy | 1                  | 205           | 320               | 370                      |
| State     | >10% inpatient bed occupancy | 2                  | 203           | 240               | 327                      |
| County    | >1 death/100K/wk             | 1                  | 47,978        | 30,373            | 29,451                   |
| County    | >1 death/100K/wk             | 2                  | 38,299        | 22,095            | 20,811                   |
| County    | >2 deaths/100K/wk            | 1                  | 46,346        | 21,410            | 29,451                   |
| County    | >2 deaths/100K/wk            | 2                  | 36,905        | 16,016            | 20,811                   |
| County    | >2 ICU patients/100K/wk      | 1                  | 23,124        | 19,065            | 29,451                   |
| County    | >2 ICU patients/100K/wk      | 2                  | 16,762        | 14,858            | 20,811                   |
| County    | >10% inpatient bed occupancy | 1                  | 14,058        | 23,451            | 29,451                   |
| County    | >10% inpatient bed occupancy | 2                  | 12,103        | 16,004            | 20,811                   |

53 **References**

- 54 1. CDC, Science Brief: Indicators for Monitoring COVID-19 Community Levels and Making Public Health Recommendations  
55 (<https://www.cdc.gov/coronavirus/2019-ncov/science/science-briefs/indicators-monitoring-community-levels.html>) (2022).

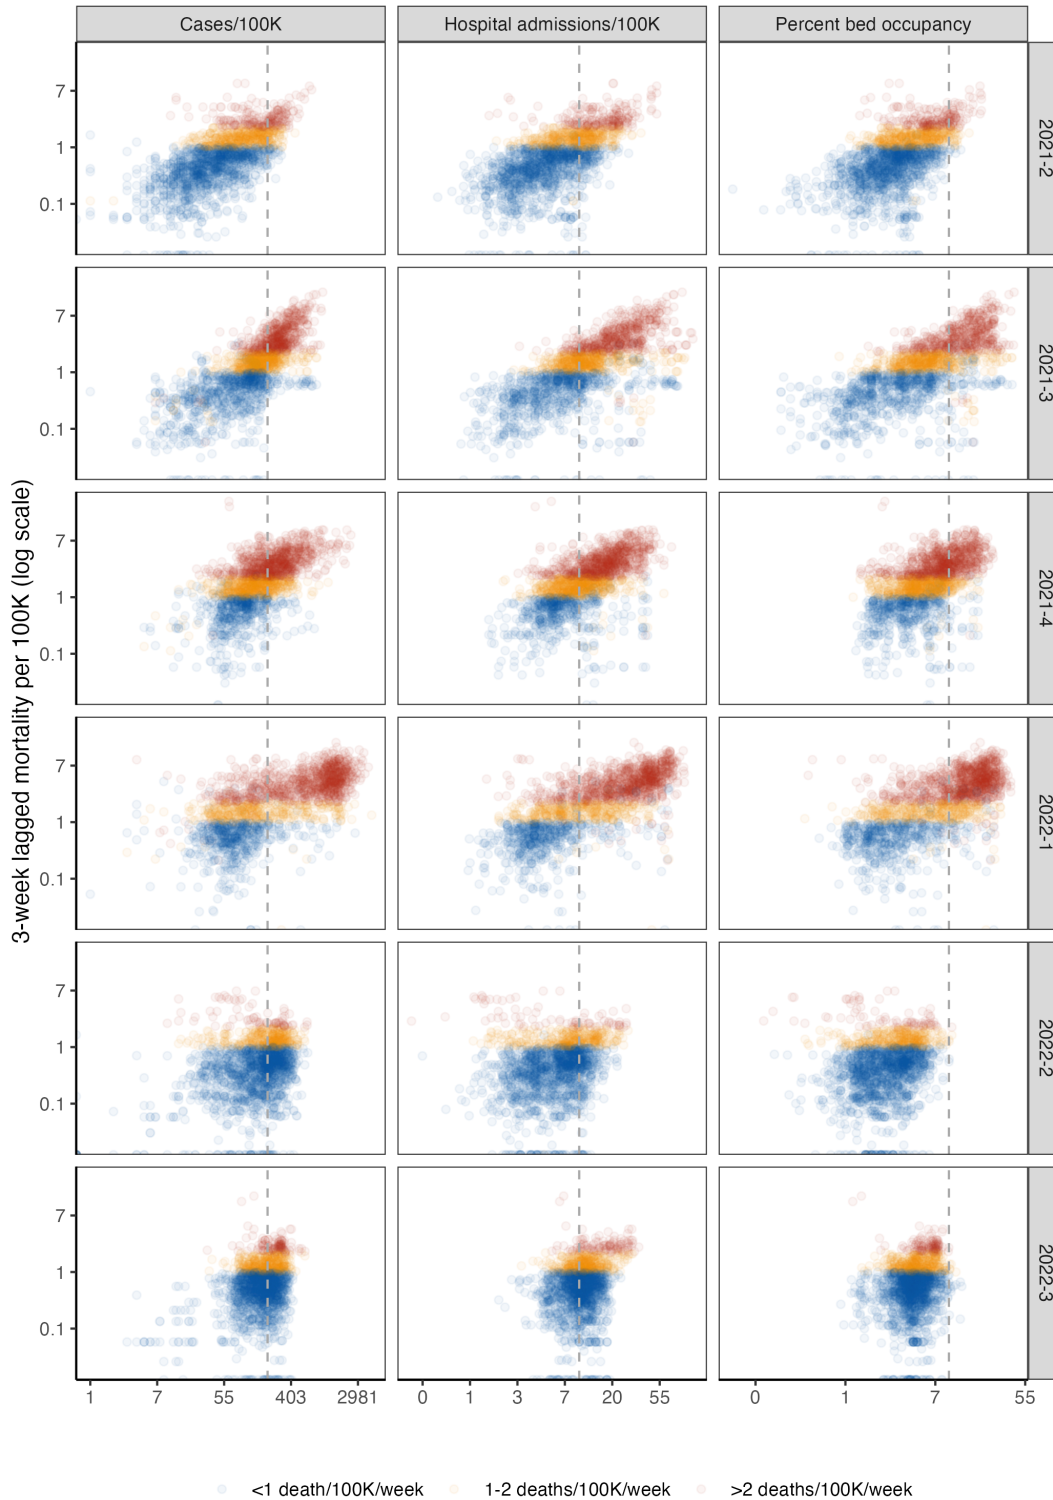

**Fig. S1.** County-level lagged mortality vs. indicator levels by quarter. Columns indicate different indicators (weekly cases per 100,000 population, new hospital admissions per 100,000 population, and percentage of inpatient beds occupied by COVID-19 patients), and rows indicate quarters. The x-axis displays indicator values on a log scale and y-axis displays 3-week ahead mortality per 100,000 population on a log scale. Each point on the scatterplot is a county-week, and counties with greater than 500,000 population are displayed. Colors show mortality outcome level. The vertical gray dotted lines indicate thresholds from CDC Community Levels for each indicator ( $\geq 200$  cases/100K/week and  $\geq 10$  new admissions/100K/week or  $\geq 10\%$  COVID-19 bed occupancy.)

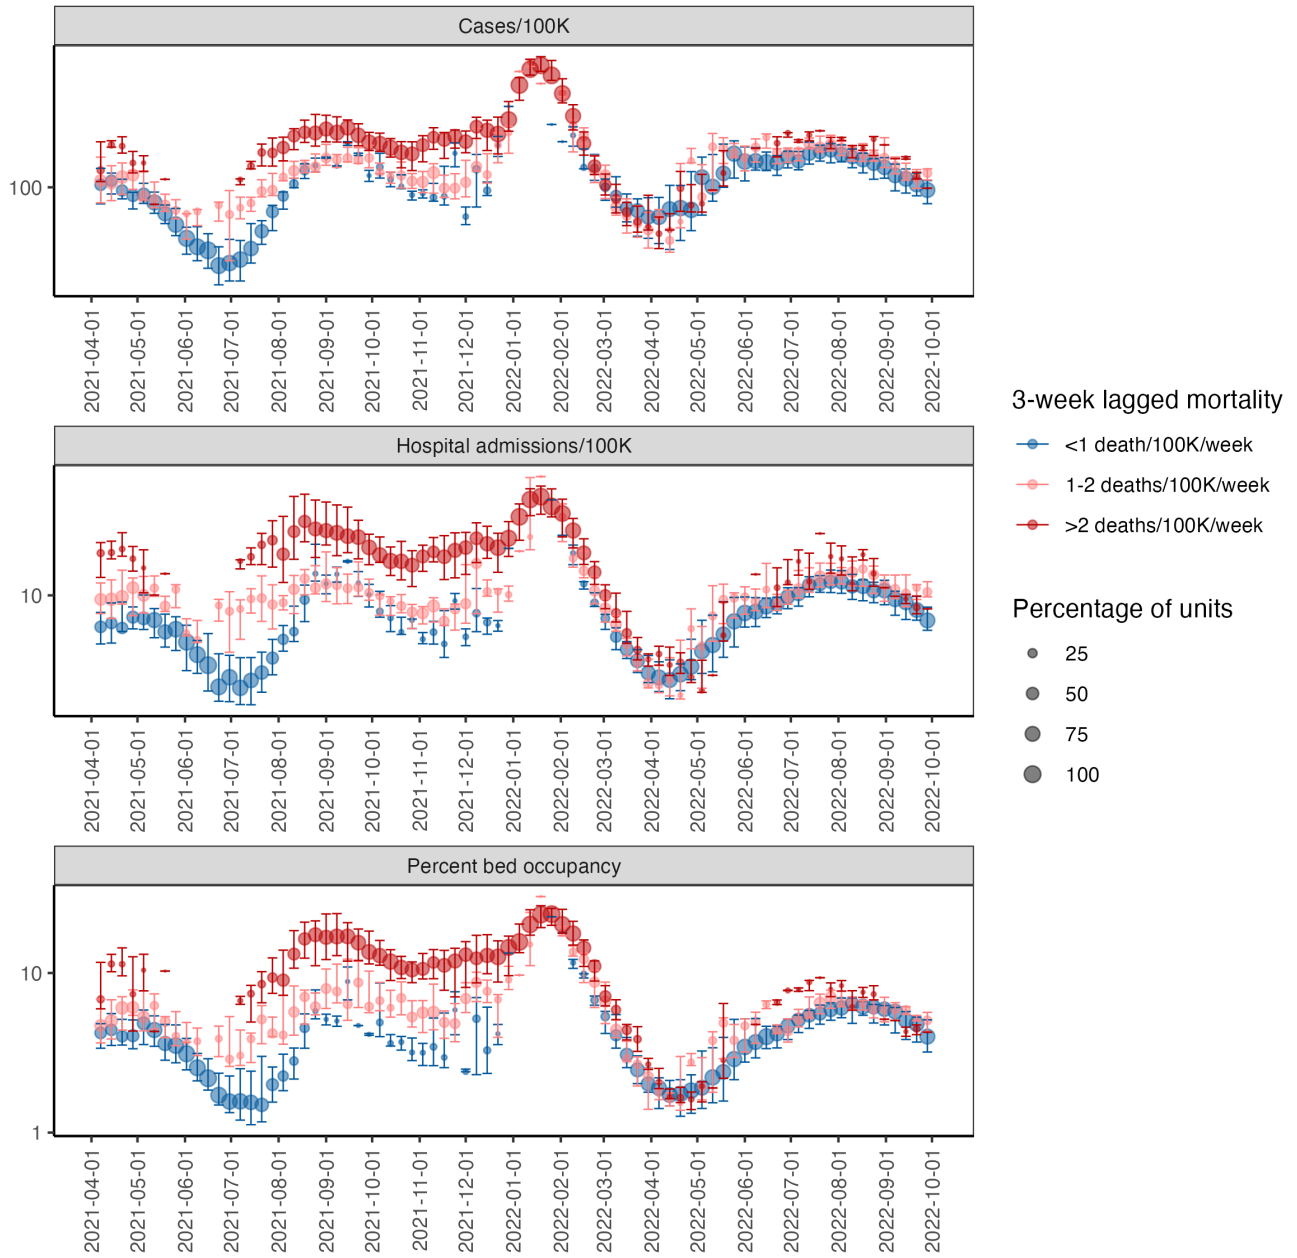

**Fig. S2.** Indicators by lagged mortality (state). Indicators vary across rows. The x-axis displays time and the y-axis displays the median (point) and interquartile range (bars) of each indicator by future mortality status.



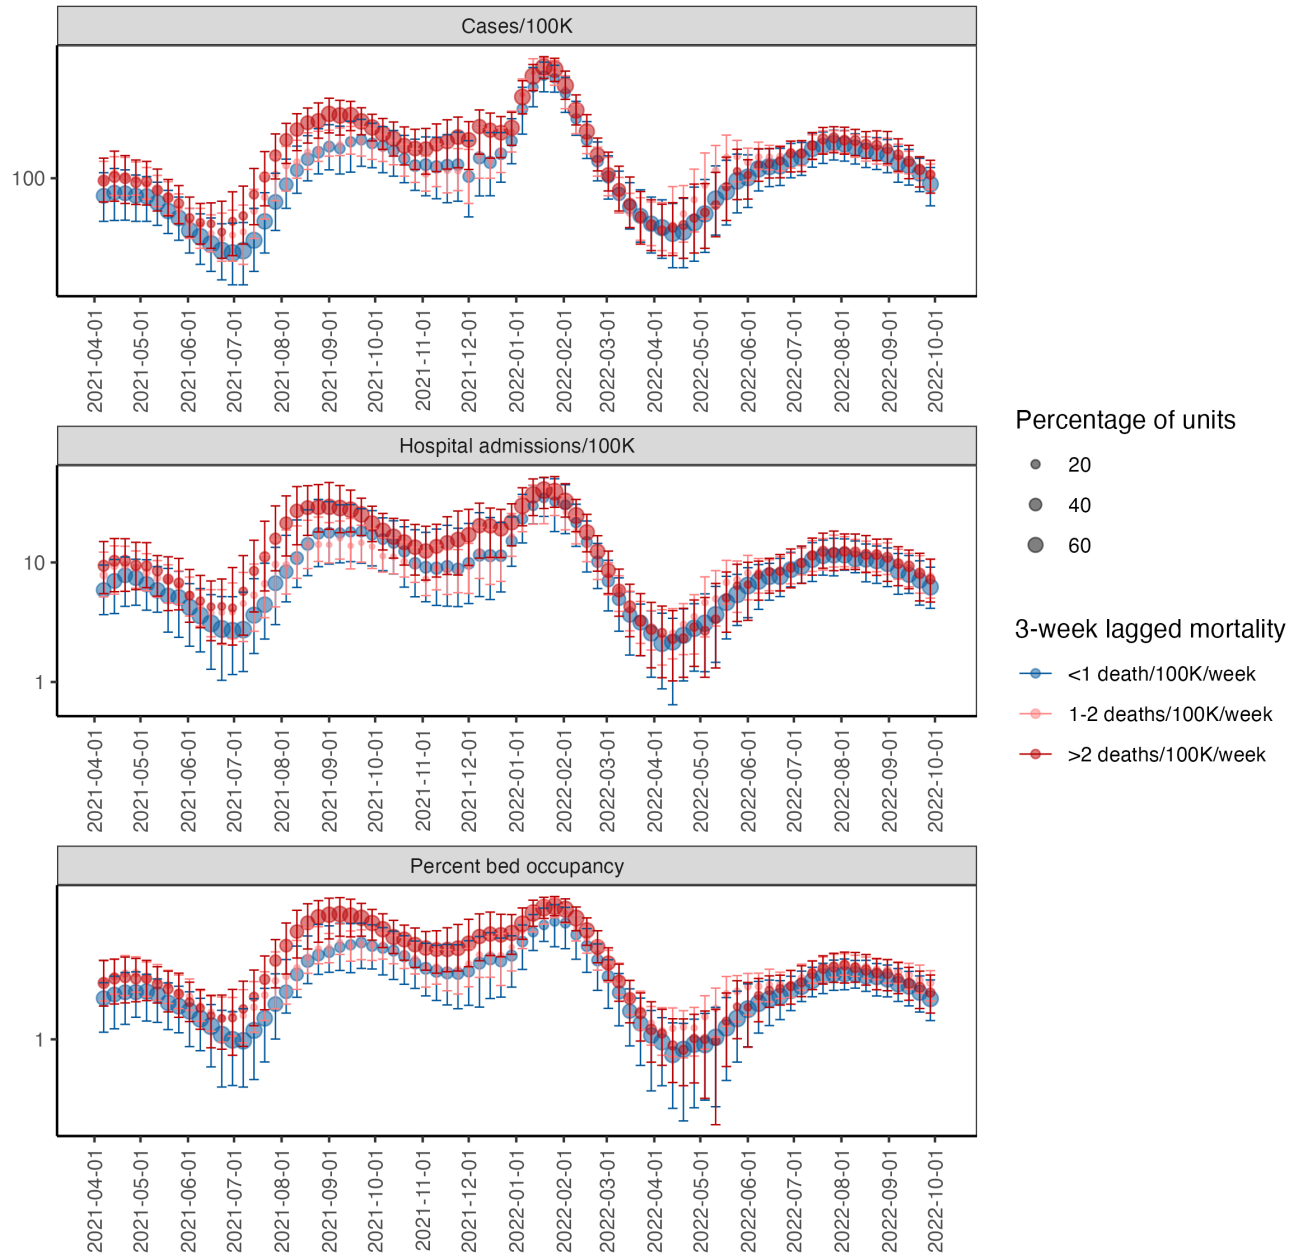

**Fig. S3.** Indicators by future mortality (county). Indicators vary across rows. The x-axis displays time and the y-axis displays the median (point) and interquartile range (bars) of each indicator by future mortality status.

### States

|                         | Neutral  |             |      |         | Don't cry wolf (0.5x FN) |             |      |         | Better safe than sorry (0.5x FP) |             |      |         |                  |                   |
|-------------------------|----------|-------------|------|---------|--------------------------|-------------|------|---------|----------------------------------|-------------|------|---------|------------------|-------------------|
|                         | Training | Training MR | Test | Test MR | Training                 | Training MR | Test | Test MR | Training                         | Training MR | Test | Test MR |                  |                   |
| Adaptive: CHO           | 88       | 3           | 80   | 10      | 87                       | 5           | 86   | 2       | 90                               | 3           | 75   | 14      | >1 death/100K/wk |                   |
| Adaptive: CHOZ          | 88       | 3           | 83   | 5       | 88                       | 5           | 87   | 2       | 90                               | 2           | 80   | 10      |                  |                   |
| Adaptive: CHOD          | 86       | 6           | 77   | 17      | 85                       | 9           | 84   | 4       | 87                               | 5           | 74   | 16      |                  |                   |
| Adaptive: HZ            | 89       | 1           | 83   | 5       | 89                       | 3           | 87   | 1       | 91                               | 3           | 81   | 8       |                  |                   |
| Simplified adaptive: HZ | 86       | 6           | 82   | 8       | 85                       | 12          | 84   | 5       | 89                               | 5           | 82   | 4       |                  |                   |
| Community Levels        | 64       | 44          | 71   | 24      | 76                       | 28          | 72   | 29      | 53                               | 62          | 70   | 24      |                  |                   |
| Z                       | 80       | 15          | 81   | 8       | 81                       | 19          | 79   | 12      | 80                               | 25          | 83   | 3       |                  |                   |
| CHO                     | 86       | 7           | 68   | 41      | 87                       | 5           | 63   | 58      | 84                               | 11          | 73   | 22      |                  |                   |
| HO                      | 85       | 7           | 68   | 41      | 87                       | 6           | 63   | 58      | 84                               | 11          | 73   | 22      |                  |                   |
| CH                      | 87       | 5           | 56   | 52      | 86                       | 9           | 47   | 67      | 90                               | 3           | 68   | 26      |                  |                   |
| H                       | 86       | 15          | 56   | 52      | 84                       | 19          | 63   | 45      | 88                               | 8           | 62   | 26      |                  |                   |
| C                       | 86       | 5           | 45   | 60      | 86                       | 9           | 41   | 67      | 90                               | 2           | 62   | 33      |                  |                   |
| Prevalence              | 68       |             | 41   |         | 68                       |             | 41   |         | 68                               |             | 41   |         |                  |                   |
| Adaptive: CHO           | 87       | 7           | 93   | 3       | 87                       | 6           | 94   | 2       | 87                               | 8           | 93   | 3       |                  | >2 deaths/100K/wk |
| Adaptive: CHOZ          | 88       | 6           | 92   | 3       | 88                       | 5           | 93   | 3       | 88                               | 8           | 92   | 5       |                  |                   |
| Adaptive: CHOD          | 85       | 10          | 91   | 4       | 86                       | 12          | 92   | 5       | 85                               | 10          | 90   | 6       |                  |                   |
| Adaptive: HZ            | 90       | 2           | 93   | 3       | 91                       | 1           | 93   | 4       | 90                               | 2           | 92   | 3       |                  |                   |
| Simplified adaptive: HZ | 87       | 6           | 94   | 0       | 89                       | 3           | 94   | 2       | 88                               | 7           | 93   | 1       |                  |                   |
| Community Levels        | 88       | 7           | 77   | 36      | 90                       | 4           | 72   | 51      | 87                               | 12          | 82   | 24      |                  |                   |
| Z                       | 83       | 11          | 87   | 19      | 85                       | 10          | 86   | 24      | 82                               | 13          | 89   | 15      |                  |                   |
| CHO                     | 89       | 7           | 76   | 37      | 90                       | 4           | 75   | 49      | 88                               | 6           | 77   | 38      |                  |                   |
| HO                      | 88       | 6           | 91   | 5       | 90                       | 3           | 91   | 10      | 88                               | 8           | 81   | 35      |                  |                   |
| CH                      | 88       | 8           | 70   | 39      | 90                       | 2           | 91   | 10      | 88                               | 7           | 79   | 35      |                  |                   |
| H                       | 88       | 6           | 91   | 6       | 89                       | 5           | 91   | 10      | 87                               | 9           | 79   | 38      |                  |                   |
| C                       | 88       | 8           | 70   | 39      | 90                       | 4           | 62   | 55      | 88                               | 7           | 68   | 42      |                  |                   |
| Prevalence              | 36       |             | 23   |         | 36                       |             | 23   |         | 36                               |             | 23   |         |                  |                   |

### HSAs

|                         | Neutral  |             |      |         | Don't cry wolf (0.5x FN) |             |      |         | Better safe than sorry (0.5x FP) |             |      |         |                  |                   |
|-------------------------|----------|-------------|------|---------|--------------------------|-------------|------|---------|----------------------------------|-------------|------|---------|------------------|-------------------|
|                         | Training | Training MR | Test | Test MR | Training                 | Training MR | Test | Test MR | Training                         | Training MR | Test | Test MR |                  |                   |
| Adaptive: CHO           | 80       | 4           | 73   | 6       | 81                       | 3           | 80   | 2       | 84                               | 5           | 70   | 11      | >1 death/100K/wk |                   |
| Adaptive: CHOZ          | 83       | 1           | 77   | 7       | 83                       | 1           | 81   | 2       | 86                               | 1           | 78   | 0       |                  |                   |
| Adaptive: CHOD          | 80       | 4           | 74   | 7       | 81                       | 3           | 81   | 2       | 84                               | 5           | 71   | 11      |                  |                   |
| Adaptive: HZ            | 82       | 3           | 77   | 0       | 83                       | 1           | 81   | 2       | 86                               | 2           | 78   | 0       |                  |                   |
| Simplified adaptive: HZ | 81       | 3           | 76   | 1       | 80                       | 7           | 80   | 3       | 85                               | 3           | 78   | 1       |                  |                   |
| Community Levels        | 64       | 31          | 68   | 13      | 75                       | 14          | 73   | 13      | 52                               | 49          | 63   | 27      |                  |                   |
| Z                       | 78       | 9           | 75   | 2       | 78                       | 11          | 74   | 12      | 77                               | 16          | 77   | 3       |                  |                   |
| CHO                     | 75       | 15          | 70   | 13      | 81                       | 4           | 73   | 18      | 68                               | 26          | 66   | 16      |                  |                   |
| HO                      | 75       | 15          | 70   | 13      | 81                       | 4           | 73   | 18      | 68                               | 26          | 66   | 16      |                  |                   |
| CH                      | 81       | 4           | 58   | 31      | 81                       | 3           | 52   | 47      | 81                               | 8           | 66   | 15      |                  |                   |
| H                       | 80       | 6           | 58   | 31      | 81                       | 6           | 68   | 26      | 82                               | 6           | 67   | 15      |                  |                   |
| C                       | 79       | 5           | 50   | 42      | 80                       | 3           | 46   | 54      | 83                               | 5           | 64   | 23      |                  |                   |
| Prevalence              | 66       |             | 48   |         | 66                       |             | 48   |         | 66                               |             | 48   |         |                  |                   |
| Adaptive: CHO           | 82       | 4           | 88   | 0       | 84                       | 5           | 91   | 1       | 83                               | 5           | 87   | 2       |                  | >2 deaths/100K/wk |
| Adaptive: CHOZ          | 84       | 1           | 88   | 0       | 86                       | 2           | 91   | 1       | 85                               | 1           | 88   | 0       |                  |                   |
| Adaptive: CHOD          | 81       | 6           | 89   | 0       | 83                       | 7           | 90   | 2       | 82                               | 5           | 87   | 1       |                  |                   |
| Adaptive: HZ            | 83       | 4           | 88   | 1       | 85                       | 3           | 90   | 4       | 84                               | 4           | 87   | 1       |                  |                   |
| Simplified adaptive: HZ | 82       | 5           | 87   | 2       | 83                       | 5           | 91   | 1       | 82                               | 4           | 86   | 2       |                  |                   |
| Community Levels        | 83       | 5           | 76   | 24      | 85                       | 2           | 73   | 37      | 81                               | 13          | 78   | 14      |                  |                   |
| Z                       | 80       | 6           | 82   | 11      | 81                       | 11          | 81   | 17      | 79                               | 9           | 84   | 9       |                  |                   |
| CHO                     | 82       | 4           | 80   | 19      | 85                       | 3           | 86   | 10      | 82                               | 5           | 80   | 17      |                  |                   |
| HO                      | 82       | 7           | 85   | 5       | 85                       | 2           | 86   | 10      | 82                               | 7           | 81   | 12      |                  |                   |
| CH                      | 82       | 3           | 72   | 34      | 85                       | 4           | 85   | 12      | 82                               | 5           | 75   | 23      |                  |                   |
| H                       | 82       | 7           | 83   | 9       | 84                       | 2           | 84   | 15      | 82                               | 5           | 75   | 24      |                  |                   |
| C                       | 82       | 7           | 66   | 33      | 85                       | 5           | 73   | 27      | 82                               | 8           | 66   | 31      |                  |                   |
| Prevalence              | 37       |             | 26   |         | 37                       |             | 26   |         | 37                               |             | 26   |         |                  |                   |

### Counties

|                         | Neutral  |             |      |         | Don't cry wolf (0.5x FN) |             |      |         | Better safe than sorry (0.5x FP) |             |      |         |                  |                   |
|-------------------------|----------|-------------|------|---------|--------------------------|-------------|------|---------|----------------------------------|-------------|------|---------|------------------|-------------------|
|                         | Training | Training MR | Test | Test MR | Training                 | Training MR | Test | Test MR | Training                         | Training MR | Test | Test MR |                  |                   |
| Adaptive: CHO           | 75       | 4           | 73   | 4       | 78                       | 3           | 79   | 4       | 79                               | 4           | 70   | 9       | >1 death/100K/wk |                   |
| Adaptive: CHOZ          | 77       | 0           | 75   | 0       | 79                       | 0           | 80   | 2       | 80                               | 0           | 75   | 1       |                  |                   |
| Adaptive: CHOD          | 75       | 3           | 74   | 2       | 77                       | 3           | 81   | 1       | 79                               | 3           | 71   | 6       |                  |                   |
| Adaptive: HZ            | 75       | 4           | 75   | 1       | 78                       | 2           | 80   | 3       | 78                               | 5           | 75   | 1       |                  |                   |
| Simplified adaptive: HZ | 74       | 5           | 74   | 4       | 76                       | 5           | 78   | 5       | 79                               | 4           | 75   | 1       |                  |                   |
| Community Levels        | 67       | 18          | 69   | 8       | 75                       | 6           | 73   | 15      | 58                               | 35          | 65   | 20      |                  |                   |
| Z                       | 73       | 6           | 72   | 4       | 74                       | 13          | 71   | 12      | 73                               | 14          | 73   | 5       |                  |                   |
| CHO                     | 74       | 6           | 70   | 9       | 78                       | 2           | 73   | 19      | 70                               | 16          | 68   | 12      |                  |                   |
| HO                      | 73       | 7           | 70   | 10      | 77                       | 4           | 73   | 21      | 70                               | 16          | 68   | 11      |                  |                   |
| CH                      | 75       | 4           | 57   | 31      | 78                       | 2           | 68   | 28      | 78                               | 3           | 66   | 13      |                  |                   |
| H                       | 73       | 10          | 56   | 33      | 76                       | 4           | 67   | 31      | 78                               | 4           | 66   | 13      |                  |                   |
| C                       | 75       | 3           | 54   | 32      | 77                       | 2           | 55   | 39      | 78                               | 3           | 63   | 21      |                  |                   |
| Prevalence              | 58       |             | 44   |         | 58                       |             | 44   |         | 58                               |             | 44   |         |                  |                   |
| Adaptive: CHO           | 79       | 4           | 86   | 1       | 82                       | 4           | 88   | 0       | 80                               | 4           | 84   | 3       |                  | >2 deaths/100K/wk |
| Adaptive: CHOZ          | 81       | 1           | 86   | 0       | 84                       | 0           | 88   | 1       | 82                               | 0           | 85   | 0       |                  |                   |
| Adaptive: CHOD          | 78       | 5           | 86   | 1       | 81                       | 5           | 89   | 0       | 79                               | 4           | 85   | 1       |                  |                   |
| Adaptive: HZ            | 80       | 4           | 85   | 2       | 83                       | 1           | 87   | 3       | 80                               | 4           | 84   | 2       |                  |                   |
| Simplified adaptive: HZ | 79       | 3           | 85   | 2       | 83                       | 3           | 89   | 0       | 79                               | 4           | 84   | 2       |                  |                   |
| Community Levels        | 80       | 3           | 75   | 23      | 81                       | 4           | 72   | 33      | 79                               | 9           | 77   | 13      |                  |                   |
| Z                       | 78       | 6           | 80   | 10      | 78                       | 12          | 79   | 15      | 77                               | 8           | 81   | 10      |                  |                   |
| CHO                     | 80       | 4           | 83   | 5       | 84                       | 1           | 85   | 7       | 80                               | 5           | 80   | 11      |                  |                   |
| HO                      | 79       | 4           | 83   | 6       | 83                       | 2           | 88   | 0       | 79                               | 5           | 80   | 12      |                  |                   |
| CH                      | 80       | 4           | 82   | 8       | 83                       | 1           | 84   | 10      | 80                               | 3           | 74   | 21      |                  |                   |
| H                       | 79       | 4           | 82   | 9       | 82                       | 3           | 87   | 2       | 79                               | 4           | 74   | 23      |                  |                   |
| C                       | 80       | 4           | 65   | 31      | 83                       | 3           | 71   | 26      | 79                               | 5           | 66   | 28      |                  |                   |
| Prevalence              | 35       |             | 25   |         | 35                       |             | 25   |         | 35                               |             | 25   |         |                  |                   |

**Fig. S4.** Head-to-head comparison results, including HSA-level results. The top plots display results from state-level analyses, middle from HSA-level analyses, and bottom from county-level analyses, all weighted for population. Metrics are displayed on the left, with training data from Q2-Q4 2021 and test data from Q1-Q3 2022. Cells report weighted accuracy and maximum regret (MR) over training and test periods. Rows vary outcomes, and columns vary preferences for false positives versus false negatives, with "neutral" corresponding to unweighted accuracy. Prevalence indicates the population-weighted proportion of high location-weeks in a given time period. Secondary outcomes are presented in Figure S5, and weighted accuracy by quarter is presented in Figures S6-S8. For adaptive metrics, models vary functional form to include: 1) CHO (cases, hospitalizations, inpatient bed occupancy); 2) CHOZ (cases, hospitalizations, inpatient bed occupancy, current risk designation); 3) CHOD (cases, hospitalizations, inpatient bed occupancy, weekly changes in each indicator); 4) HZ (hospitalizations, current risk designation); 5) Simplified HZ (hospitalizations, current risk designation – updated quarterly). (For additional adaptive functional forms, see Figure S9.)

States

|                         | Neutral       |             |      |         | Don't cry wolf (0.5x FN) |             |      |         | Better safe than sorry (0.5x FP) |             |      |         |                              |   |
|-------------------------|---------------|-------------|------|---------|--------------------------|-------------|------|---------|----------------------------------|-------------|------|---------|------------------------------|---|
|                         | Training      | Training MR | Test | Test MR | Training                 | Training MR | Test | Test MR | Training                         | Training MR | Test | Test MR |                              |   |
|                         | Adaptive: CHO | 87          | 6    | 93      | 5                        | 88          | 5    | 92      | 5                                | 86          | 7    | 94      |                              | 3 |
| Adaptive: CHOZ          | 86            | 9           | 91   | 7       | 87                       | 9           | 89   | 8       | 86                               | 7           | 93   | 4       |                              |   |
| Adaptive: CHOD          | 90            | 4           | 93   | 3       | 91                       | 0           | 93   | 4       | 90                               | 5           | 94   | 3       |                              |   |
| Adaptive: HZ            | 86            | 8           | 93   | 5       | 87                       | 9           | 92   | 6       | 87                               | 7           | 94   | 4       |                              |   |
| Simplified adaptive: HZ | 85            | 14          | 89   | 17      | 86                       | 11          | 87   | 20      | 85                               | 15          | 91   | 14      |                              |   |
| Community Levels        | 60            | 42          | 79   | 34      | 73                       | 24          | 73   | 48      | 47                               | 58          | 86   | 21      |                              |   |
| Z                       | 84            | 12          | 90   | 14      | 85                       | 13          | 87   | 19      | 83                               | 18          | 92   | 9       |                              |   |
| CHO                     | 84            | 16          | 61   | 68      | 87                       | 9           | 48   | 93      | 80                               | 23          | 74   | 44      |                              |   |
| HO                      | 83            | 16          | 61   | 68      | 87                       | 9           | 48   | 93      | 80                               | 23          | 74   | 44      |                              |   |
| CH                      | 88            | 7           | 38   | 88      | 87                       | 9           | 27   | 96      | 89                               | 6           | 59   | 57      |                              |   |
| H                       | 84            | 17          | 37   | 89      | 81                       | 17          | 59   | 77      | 88                               | 7           | 58   | 57      |                              |   |
| C                       | 87            | 9           | 24   | 90      | 87                       | 6           | 22   | 96      | 89                               | 3           | 49   | 58      |                              |   |
| Prevalence              | 73            |             | 17   |         | 73                       |             | 17   |         | 73                               |             | 17   |         |                              |   |
| Adaptive: CHO           | 85            | 5           | 93   | 9       | 85                       | 11          | 93   | 9       | 87                               | 5           | 95   | 7       | ≥10% inpatient bed occupancy |   |
| Adaptive: CHOZ          | 85            | 6           | 91   | 13      | 85                       | 11          | 90   | 16      | 86                               | 5           | 94   | 10      |                              |   |
| Adaptive: CHOD          | 88            | 4           | 97   | 0       | 88                       | 5           | 96   | 0       | 89                               | 2           | 97   | 0       |                              |   |
| Adaptive: HZ            | 83            | 10          | 91   | 15      | 84                       | 10          | 89   | 22      | 84                               | 8           | 94   | 10      |                              |   |
| Simplified adaptive: HZ | 82            | 16          | 93   | 11      | 86                       | 9           | 92   | 13      | 80                               | 25          | 94   | 11      |                              |   |
| Community Levels        | 88            | 4           | 74   | 43      | 89                       | 6           | 65   | 58      | 87                               | 5           | 82   | 29      |                              |   |
| Z                       | 64            | 39          | 89   | 23      | 76                       | 23          | 93   | 11      | 52                               | 59          | 85   | 37      |                              |   |
| CHO                     | 87            | 4           | 73   | 44      | 89                       | 4           | 78   | 31      | 87                               | 4           | 76   | 43      |                              |   |
| HO                      | 85            | 8           | 88   | 12      | 86                       | 10          | 91   | 8       | 84                               | 10          | 78   | 40      |                              |   |
| CH                      | 88            | 4           | 74   | 43      | 89                       | 4           | 77   | 32      | 87                               | 4           | 78   | 40      |                              |   |
| H                       | 84            | 8           | 88   | 12      | 86                       | 10          | 91   | 8       | 83                               | 12          | 75   | 44      |                              |   |
| C                       | 87            | 4           | 66   | 46      | 89                       | 4           | 72   | 32      | 86                               | 7           | 78   | 31      |                              |   |
| Prevalence              | 36            |             | 11   |         | 36                       |             | 11   |         | 36                               |             | 11   |         |                              |   |

HSAs

|                         | Neutral       |             |      |         | Don't cry wolf (0.5x FN) |             |      |         | Better safe than sorry (0.5x FP) |             |      |         |                              |   |
|-------------------------|---------------|-------------|------|---------|--------------------------|-------------|------|---------|----------------------------------|-------------|------|---------|------------------------------|---|
|                         | Training      | Training MR | Test | Test MR | Training                 | Training MR | Test | Test MR | Training                         | Training MR | Test | Test MR |                              |   |
|                         | Adaptive: CHO | 81          | 4    | 91      | 1                        | 82          | 4    | 90      | 4                                | 83          | 3    | 91      |                              | 3 |
| Adaptive: CHOZ          | 82            | 2           | 91   | 1       | 83                       | 4           | 91   | 3       | 83                               | 3           | 92   | 1       |                              |   |
| Adaptive: CHOD          | 82            | 3           | 90   | 2       | 83                       | 4           | 92   | 1       | 84                               | 3           | 91   | 3       |                              |   |
| Adaptive: HZ            | 80            | 6           | 91   | 3       | 82                       | 3           | 90   | 4       | 82                               | 7           | 91   | 3       |                              |   |
| Simplified adaptive: HZ | 80            | 7           | 88   | 11      | 80                       | 9           | 86   | 16      | 80                               | 13          | 88   | 14      |                              |   |
| Community Levels        | 66            | 25          | 80   | 25      | 76                       | 12          | 74   | 36      | 55                               | 39          | 85   | 16      |                              |   |
| Z                       | 80            | 6           | 89   | 9       | 81                       | 7           | 86   | 15      | 79                               | 13          | 91   | 5       |                              |   |
| CHO                     | 75            | 14          | 75   | 32      | 81                       | 5           | 70   | 43      | 70                               | 24          | 82   | 22      |                              |   |
| HO                      | 75            | 14          | 75   | 32      | 81                       | 5           | 68   | 45      | 70                               | 24          | 82   | 22      |                              |   |
| CH                      | 81            | 6           | 43   | 78      | 83                       | 2           | 33   | 95      | 83                               | 5           | 62   | 50      |                              |   |
| H                       | 80            | 11          | 42   | 78      | 80                       | 6           | 62   | 59      | 83                               | 4           | 61   | 50      |                              |   |
| C                       | 80            | 7           | 42   | 74      | 82                       | 3           | 23   | 95      | 83                               | 5           | 51   | 53      |                              |   |
| Prevalence              | 63            |             | 17   |         | 63                       |             | 17   |         | 63                               |             | 17   |         |                              |   |
| Adaptive: CHO           | 84            | 10          | 90   | 15      | 86                       | 10          | 90   | 15      | 84                               | 6           | 93   | 7       | ≥10% inpatient bed occupancy |   |
| Adaptive: CHOZ          | 84            | 10          | 90   | 15      | 86                       | 10          | 90   | 16      | 84                               | 7           | 93   | 7       |                              |   |
| Adaptive: CHOD          | 89            | 1           | 95   | 0       | 90                       | 1           | 95   | 1       | 88                               | 0           | 95   | 0       |                              |   |
| Adaptive: HZ            | 83            | 9           | 90   | 15      | 86                       | 7           | 87   | 24      | 83                               | 8           | 93   | 7       |                              |   |
| Simplified adaptive: HZ | 79            | 18          | 91   | 12      | 84                       | 10          | 90   | 15      | 79                               | 21          | 93   | 8       |                              |   |
| Community Levels        | 83            | 8           | 75   | 33      | 82                       | 9           | 67   | 45      | 85                               | 5           | 83   | 22      |                              |   |
| Z                       | 72            | 26          | 91   | 13      | 81                       | 15          | 94   | 4       | 63                               | 39          | 88   | 25      |                              |   |
| CHO                     | 85            | 8           | 84   | 16      | 87                       | 4           | 85   | 15      | 84                               | 39          | 86   | 17      |                              |   |
| HO                      | 83            | 8           | 91   | 11      | 87                       | 6           | 92   | 9       | 82                               | 7           | 85   | 19      |                              |   |
| CH                      | 85            | 8           | 77   | 25      | 87                       | 5           | 83   | 15      | 84                               | 8           | 77   | 29      |                              |   |
| H                       | 82            | 10          | 91   | 6       | 86                       | 8           | 92   | 6       | 82                               | 8           | 90   | 10      |                              |   |
| C                       | 85            | 8           | 76   | 26      | 87                       | 5           | 79   | 18      | 84                               | 8           | 76   | 30      |                              |   |
| Prevalence              | 28            |             | 9    |         | 28                       |             | 9    |         | 28                               |             | 9    |         |                              |   |

Counties

|                         | Neutral       |             |      |         | Don't cry wolf (0.5x FN) |             |      |         | Better safe than sorry (0.5x FP) |             |      |         |                              |   |
|-------------------------|---------------|-------------|------|---------|--------------------------|-------------|------|---------|----------------------------------|-------------|------|---------|------------------------------|---|
|                         | Training      | Training MR | Test | Test MR | Training                 | Training MR | Test | Test MR | Training                         | Training MR | Test | Test MR |                              |   |
|                         | Adaptive: CHO | 81          | 4    | 91      | 2                        | 82          | 4    | 91      | 4                                | 83          | 4    | 91      |                              | 3 |
| Adaptive: CHOZ          | 82            | 3           | 91   | 3       | 83                       | 3           | 91   | 3       | 83                               | 3           | 92   | 2       |                              |   |
| Adaptive: CHOD          | 82            | 3           | 91   | 2       | 83                       | 3           | 92   | 1       | 84                               | 4           | 91   | 3       |                              |   |
| Adaptive: HZ            | 81            | 6           | 91   | 3       | 82                       | 3           | 91   | 4       | 82                               | 6           | 91   | 4       |                              |   |
| Simplified adaptive: HZ | 80            | 7           | 88   | 12      | 80                       | 8           | 87   | 15      | 80                               | 11          | 88   | 14      |                              |   |
| Community Levels        | 66            | 25          | 80   | 23      | 76                       | 12          | 75   | 34      | 55                               | 38          | 86   | 15      |                              |   |
| Z                       | 80            | 6           | 89   | 9       | 81                       | 8           | 86   | 14      | 80                               | 12          | 91   | 6       |                              |   |
| CHO                     | 76            | 14          | 76   | 32      | 81                       | 4           | 69   | 44      | 70                               | 23          | 82   | 21      |                              |   |
| HO                      | 76            | 14          | 76   | 32      | 81                       | 4           | 69   | 44      | 70                               | 22          | 82   | 21      |                              |   |
| CH                      | 81            | 5           | 45   | 76      | 83                       | 3           | 35   | 94      | 83                               | 4           | 63   | 48      |                              |   |
| H                       | 80            | 11          | 43   | 77      | 81                       | 6           | 63   | 58      | 83                               | 5           | 62   | 49      |                              |   |
| C                       | 79            | 8           | 44   | 71      | 81                       | 4           | 25   | 95      | 82                               | 7           | 53   | 52      |                              |   |
| Prevalence              | 63            |             | 19   |         | 63                       |             | 19   |         | 63                               |             | 19   |         |                              |   |
| Adaptive: CHO           | 84            | 8           | 90   | 13      | 86                       | 8           | 90   | 15      | 84                               | 6           | 93   | 6       | ≥10% inpatient bed occupancy |   |
| Adaptive: CHOZ          | 84            | 8           | 90   | 13      | 86                       | 8           | 89   | 16      | 84                               | 6           | 93   | 6       |                              |   |
| Adaptive: CHOD          | 88            | 1           | 95   | 0       | 89                       | 1           | 95   | 1       | 87                               | 0           | 95   | 0       |                              |   |
| Adaptive: HZ            | 83            | 7           | 90   | 14      | 86                       | 5           | 87   | 22      | 83                               | 7           | 93   | 7       |                              |   |
| Simplified adaptive: HZ | 79            | 17          | 91   | 11      | 84                       | 9           | 90   | 14      | 79                               | 20          | 93   | 7       |                              |   |
| Community Levels        | 84            | 6           | 76   | 31      | 83                       | 9           | 68   | 42      | 85                               | 4           | 84   | 21      |                              |   |
| Z                       | 72            | 24          | 91   | 13      | 81                       | 14          | 94   | 4       | 62                               | 38          | 87   | 24      |                              |   |
| CHO                     | 84            | 7           | 84   | 16      | 87                       | 5           | 86   | 13      | 83                               | 8           | 86   | 16      |                              |   |
| HO                      | 83            | 7           | 91   | 9       | 87                       | 5           | 92   | 7       | 82                               | 7           | 91   | 8       |                              |   |
| CH                      | 84            | 7           | 77   | 25      | 87                       | 5           | 83   | 15      | 83                               | 8           | 77   | 27      |                              |   |
| H                       | 82            | 9           | 91   | 5       | 86                       | 7           | 92   | 5       | 82                               | 7           | 90   | 11      |                              |   |
| C                       | 84            | 7           | 76   | 26      | 86                       | 5           | 78   | 18      | 83                               | 8           | 76   | 28      |                              |   |
| Prevalence              | 28            |             | 9    |         | 28                       |             | 9    |         | 28                               |             | 9    |         |                              |   |

**Fig. S5.** Head-to-head comparison results for secondary outcomes. The top plots display results from state-level analyses, middle from HSA-level analyses, and bottom from county-level analyses, all weighted for population. Metrics are displayed on the left, with training data from Q2-Q4 2021 and test data from Q1-Q3 2022. Cells report weighted accuracy and maximum regret (MR) over training and test periods. Rows vary outcomes, and columns vary preferences for false positives versus false negatives, with "neutral" corresponding to unweighted accuracy. Prevalence indicates the population-weighted proportion of high location-weeks in a given time period. Weighted accuracy by quarter is presented in Figures S6-S8. For adaptive metrics, models vary functional form to include: 1) CHO (cases, hospitalizations, inpatient bed occupancy); 2) CHOZ (cases, hospitalizations, inpatient bed occupancy, current risk designation); 3) CHOD (cases, hospitalizations, inpatient bed occupancy, weekly changes in each indicator); 4) HZ (hospitalizations, current risk designation); 5) Simplified HZ (hospitalizations, current risk designation – updated quarterly)

States

|                         | Neutral |      |      |      |      |      |      |          |         | Don't cry wolf (0.5x FN) |      |      |      |      |      |      |          |         | Better safe than sorry (0.5x FP) |      |      |      |      |      |      |          |         |                         |                             |
|-------------------------|---------|------|------|------|------|------|------|----------|---------|--------------------------|------|------|------|------|------|------|----------|---------|----------------------------------|------|------|------|------|------|------|----------|---------|-------------------------|-----------------------------|
|                         | 21-2    | 21-3 | 21-4 | 22-1 | 22-2 | 22-3 | Test | Training | Overall | 21-2                     | 21-3 | 21-4 | 22-1 | 22-2 | 22-3 | Test | Training | Overall | 21-2                             | 21-3 | 21-4 | 22-1 | 22-2 | 22-3 | Test | Training | Overall |                         |                             |
| Adaptive: CHO           | 80      | 90   | 93   | 85   | 83   | 73   | 80   | 88       | 84      | 81                       | 88   | 92   | 87   | 89   | 83   | 86   | 87       | 87      | 81                               | 93   | 96   | 81   | 78   | 66   | 75   | 90       | 82      | ~1 death/100K/wk        |                             |
| Adaptive: CHOD          | 81      | 90   | 92   | 85   | 84   | 80   | 83   | 88       | 85      | 83                       | 88   | 91   | 87   | 89   | 84   | 87   | 88       | 87      | 83                               | 93   | 94   | 80   | 82   | 76   | 80   | 90       | 85      |                         |                             |
| Adaptive: HZ            | 80      | 87   | 90   | 83   | 82   | 66   | 77   | 86       | 81      | 81                       | 84   | 90   | 85   | 87   | 80   | 84   | 85       | 84      | 80                               | 90   | 91   | 80   | 78   | 64   | 74   | 87       | 80      |                         |                             |
| Simplified adaptive: HZ | 75      | 89   | 94   | 82   | 81   | 83   | 82   | 86       | 84      | 82                       | 93   | 92   | 88   | 90   | 84   | 87   | 89       | 88      | 84                               | 92   | 96   | 82   | 82   | 80   | 81   | 91       | 86      |                         |                             |
| Community Levels        | 71      | 72   | 50   | 75   | 79   | 59   | 71   | 64       | 68      | 81                       | 81   | 66   | 83   | 80   | 55   | 72   | 76       | 74      | 79                               | 91   | 96   | 86   | 79   | 80   | 82   | 89       | 85      |                         |                             |
| Z                       | 72      | 78   | 91   | 82   | 81   | 80   | 81   | 80       | 81      | 66                       | 85   | 91   | 77   | 81   | 80   | 79   | 81       | 80      | 62                               | 62   | 34   | 66   | 79   | 64   | 70   | 53       | 61      |                         |                             |
| CHO                     | 79      | 90   | 87   | 87   | 75   | 42   | 68   | 86       | 77      | 80                       | 92   | 90   | 89   | 75   | 26   | 63   | 87       | 75      | 79                               | 88   | 85   | 85   | 76   | 58   | 73   | 84       | 78      |                         |                             |
| HO                      | 79      | 90   | 87   | 87   | 75   | 42   | 68   | 85       | 77      | 79                       | 92   | 90   | 89   | 75   | 26   | 63   | 87       | 75      | 79                               | 88   | 85   | 85   | 76   | 58   | 73   | 84       | 78      |                         |                             |
| CH                      | 76      | 93   | 93   | 88   | 48   | 31   | 56   | 87       | 72      | 81                       | 92   | 85   | 86   | 36   | 17   | 47   | 86       | 66      | 81                               | 95   | 94   | 88   | 63   | 54   | 68   | 90       | 79      |                         |                             |
| H                       | 66      | 91   | 94   | 90   | 49   | 31   | 56   | 83       | 70      | 85                       | 93   | 75   | 87   | 79   | 39   | 68   | 84       | 76      | 76                               | 94   | 96   | 90   | 63   | 54   | 69   | 88       | 79      |                         |                             |
| C                       | 76      | 89   | 93   | 80   | 24   | 29   | 45   | 86       | 65      | 81                       | 92   | 85   | 84   | 23   | 17   | 41   | 86       | 64      | 82                               | 93   | 94   | 84   | 49   | 53   | 62   | 90       | 76      |                         |                             |
| Prevalence              | 35      | 75   | 94   | 78   | 17   | 29   | 41   | 68       | 55      | 35                       | 75   | 94   | 78   | 17   | 29   | 41   | 68       | 55      | 35                               | 75   | 94   | 78   | 17   | 29   | 41   | 68       | 55      |                         |                             |
| Adaptive: CHO           | 95      | 84   | 81   | 87   | 96   | 96   | 93   | 87       | 90      | 95                       | 84   | 83   | 88   | 97   | 98   | 94   | 87       | 91      | 95                               | 86   | 81   | 87   | 95   | 95   | 93   | 87       | 90      |                         | ~2 death/100K/wk            |
| Adaptive: CHOD          | 96      | 86   | 82   | 87   | 96   | 93   | 92   | 88       | 90      | 96                       | 86   | 83   | 88   | 97   | 95   | 93   | 88       | 91      | 95                               | 88   | 81   | 87   | 95   | 92   | 92   | 88       | 90      |                         |                             |
| Adaptive: HZ            | 96      | 79   | 80   | 87   | 94   | 92   | 91   | 85       | 88      | 97                       | 78   | 83   | 89   | 96   | 93   | 92   | 86       | 89      | 96                               | 81   | 79   | 87   | 93   | 91   | 90   | 85       | 88      |                         |                             |
| Simplified adaptive: HZ | 95      | 87   | 88   | 87   | 97   | 95   | 93   | 90       | 91      | 96                       | 89   | 88   | 86   | 97   | 95   | 93   | 91       | 92      | 95                               | 87   | 87   | 88   | 95   | 94   | 92   | 90       | 91      |                         |                             |
| Community Levels        | 93      | 83   | 86   | 90   | 97   | 96   | 94   | 87       | 91      | 94                       | 87   | 87   | 89   | 98   | 96   | 94   | 89       | 92      | 94                               | 81   | 88   | 89   | 95   | 96   | 93   | 88       | 91      |                         |                             |
| Z                       | 92      | 81   | 77   | 71   | 95   | 96   | 87   | 83       | 85      | 91                       | 86   | 78   | 66   | 95   | 96   | 86   | 85       | 85      | 94                               | 75   | 77   | 75   | 95   | 97   | 89   | 82       | 86      |                         |                             |
| CHO                     | 96      | 89   | 81   | 86   | 84   | 59   | 76   | 89       | 83      | 96                       | 90   | 84   | 89   | 87   | 49   | 75   | 90       | 83      | 94                               | 88   | 83   | 86   | 87   | 59   | 77   | 88       | 83      |                         |                             |
| HO                      | 95      | 88   | 82   | 88   | 96   | 91   | 91   | 88       | 90      | 94                       | 89   | 87   | 90   | 95   | 88   | 91   | 90       | 91      | 89                               | 87   | 89   | 90   | 92   | 62   | 81   | 88       | 85      |                         |                             |
| CH                      | 96      | 89   | 80   | 86   | 66   | 57   | 70   | 88       | 79      | 95                       | 89   | 86   | 90   | 95   | 88   | 91   | 90       | 90      | 94                               | 87   | 82   | 86   | 88   | 62   | 79   | 88       | 83      |                         |                             |
| H                       | 94      | 88   | 82   | 88   | 95   | 90   | 91   | 88       | 90      | 92                       | 89   | 87   | 90   | 95   | 88   | 91   | 89       | 90      | 88                               | 86   | 88   | 90   | 88   | 59   | 79   | 87       | 83      |                         |                             |
| C                       | 96      | 89   | 80   | 86   | 66   | 57   | 70   | 88       | 79      | 96                       | 89   | 84   | 88   | 55   | 43   | 62   | 90       | 76      | 94                               | 88   | 82   | 86   | 64   | 55   | 68   | 88       | 78      |                         |                             |
| Prevalence              | 5       | 47   | 56   | 61   | 3    | 5    | 23   | 36       | 29      | 5                        | 47   | 56   | 61   | 3    | 5    | 23   | 36       | 29      | 5                                | 47   | 56   | 61   | 3    | 5    | 23   | 36       | 29      |                         |                             |
| Adaptive: CHO           | 78      | 92   | 90   | 90   | 94   | 94   | 93   | 87       | 90      | 81                       | 92   | 91   | 87   | 94   | 96   | 92   | 88       | 90      | 79                               | 92   | 89   | 93   | 95   | 94   | 94   | 86       | 90      | ~2 ICU patients/100K/wk |                             |
| Adaptive: CHOD          | 75      | 92   | 90   | 86   | 92   | 94   | 91   | 86       | 88      | 77                       | 92   | 92   | 82   | 91   | 95   | 89   | 87       | 88      | 78                               | 92   | 89   | 90   | 94   | 94   | 93   | 86       | 90      |                         |                             |
| Adaptive: HZ            | 84      | 95   | 91   | 89   | 96   | 95   | 93   | 90       | 92      | 86                       | 95   | 93   | 86   | 95   | 96   | 93   | 91       | 92      | 83                               | 95   | 91   | 91   | 96   | 95   | 94   | 90       | 92      |                         |                             |
| Simplified adaptive: HZ | 76      | 88   | 95   | 86   | 98   | 94   | 93   | 86       | 89      | 77                       | 90   | 92   | 82   | 98   | 95   | 92   | 87       | 89      | 79                               | 88   | 96   | 90   | 97   | 94   | 94   | 87       | 91      |                         |                             |
| Community Levels        | 68      | 58   | 53   | 91   | 86   | 61   | 79   | 60       | 70      | 79                       | 72   | 69   | 88   | 81   | 48   | 73   | 73       | 73      | 80                               | 80   | 95   | 80   | 98   | 94   | 91   | 85       | 88      |                         |                             |
| Z                       | 76      | 83   | 93   | 77   | 99   | 94   | 90   | 84       | 87      | 73                       | 88   | 93   | 69   | 99   | 93   | 87   | 85       | 86      | 80                               | 77   | 93   | 85   | 98   | 94   | 92   | 83       | 88      |                         |                             |
| CHO                     | 81      | 79   | 91   | 73   | 82   | 27   | 61   | 84       | 72      | 82                       | 86   | 93   | 64   | 76   | 3    | 48   | 87       | 67      | 79                               | 72   | 89   | 82   | 88   | 51   | 74   | 80       | 77      |                         |                             |
| HO                      | 80      | 79   | 91   | 73   | 82   | 27   | 61   | 83       | 72      | 81                       | 86   | 93   | 64   | 76   | 3    | 48   | 87       | 67      | 79                               | 72   | 89   | 82   | 88   | 51   | 74   | 80       | 77      |                         |                             |
| CH                      | 77      | 92   | 95   | 67   | 41   | 7    | 38   | 88       | 63      | 83                       | 89   | 88   | 72   | 23   | 0    | 27   | 87       | 57      | 81                               | 89   | 96   | 78   | 60   | 38   | 59   | 89       | 74      |                         |                             |
| H                       | 67      | 93   | 93   | 65   | 40   | 6    | 37   | 84       | 61      | 83                       | 85   | 76   | 77   | 80   | 19   | 59   | 81       | 70      | 76                               | 91   | 95   | 77   | 60   | 38   | 58   | 88       | 73      |                         |                             |
| C                       | 75      | 93   | 94   | 55   | 11   | 5    | 24   | 87       | 56      | 83                       | 89   | 88   | 68   | 10   | 0    | 22   | 87       | 54      | 80                               | 92   | 96   | 70   | 41   | 37   | 49   | 89       | 69      |                         |                             |
| Prevalence              | 37      | 89   | 92   | 45   | 1    | 5    | 17   | 73       | 45      | 37                       | 89   | 92   | 45   | 1    | 5    | 17   | 73       | 45      | 37                               | 89   | 92   | 45   | 1    | 5    | 17   | 73       | 45      |                         |                             |
| Adaptive: CHO           | 96      | 77   | 83   | 81   | 98   | 100  | 93   | 85       | 89      | 95                       | 74   | 86   | 80   | 98   | 100  | 93   | 85       | 89      | 95                               | 81   | 83   | 86   | 98   | 100  | 95   | 87       | 91      |                         | >1% inpatient bed occupancy |
| Adaptive: CHOD          | 95      | 76   | 83   | 77   | 98   | 100  | 91   | 85       | 88      | 95                       | 74   | 86   | 73   | 97   | 100  | 90   | 85       | 87      | 95                               | 81   | 83   | 83   | 98   | 100  | 94   | 86       | 90      |                         |                             |
| Adaptive: HZ            | 95      | 81   | 88   | 90   | 100  | 100  | 97   | 88       | 92      | 94                       | 80   | 91   | 89   | 100  | 100  | 96   | 88       | 92      | 96                               | 84   | 88   | 93   | 100  | 100  | 97   | 89       | 93      |                         |                             |
| Simplified adaptive: HZ | 96      | 76   | 78   | 75   | 99   | 100  | 91   | 83       | 87      | 97                       | 75   | 81   | 67   | 100  | 100  | 89   | 84       | 87      | 96                               | 77   | 80   | 83   | 99   | 100  | 94   | 84       | 89      |                         |                             |
| Community Levels        | 99      | 66   | 81   | 79   | 100  | 100  | 93   | 82       | 87      | 99                       | 76   | 82   | 76   | 100  | 100  | 92   | 86       | 89      | 98                               | 59   | 82   | 82   | 100  | 100  | 94   | 80       | 87      |                         |                             |
| Z                       | 95      | 82   | 86   | 80   | 85   | 57   | 74   | 88       | 81      | 93                       | 85   | 87   | 73   | 80   | 42   | 65   | 89       | 77      | 96                               | 79   | 85   | 86   | 90   | 71   | 82   | 87       | 85      |                         |                             |
| CHO                     | 98      | 83   | 87   | 77   | 85   | 68   | 77   | 89       | 83      | 99                       | 62   | 68   | 78   | 100  | 100  | 93   | 76       | 84      | 97                               | 25   | 35   | 56   | 100  | 100  | 85   | 52       | 69      |                         |                             |
| HO                      | 95      | 81   | 86   | 80   | 84   | 56   | 73   | 87       | 80      | 98                       | 83   | 87   | 78   | 88   | 69   | 78   | 89       | 84      | 94                               | 80   | 85   | 83   | 88   | 57   | 76   | 87       | 81      |                         |                             |
| CH                      | 93      | 81   | 80   | 79   | 96   | 88   | 88   | 85       | 86      | 98                       | 79   | 81   | 81   | 99   | 94   | 91   | 86       | 89      | 88                               | 81   | 82   | 81   | 93   | 60   | 78   | 84       | 81      |                         |                             |
| H                       | 95      | 81   | 87   | 80   | 85   | 57   | 74   | 88       | 81      | 98                       | 83   | 87   | 77   | 85   | 68   | 77   | 89       | 83      | 94                               | 80   | 86   | 84   | 89   | 60   | 78   | 87       | 82      |                         |                             |
| C                       | 92      | 81   | 80   | 79   | 96   | 88   | 88   | 84       | 86      | 98                       | 79   | 81   | 81   | 99   | 94   | 91   | 86       | 89      | 86                               | 82   | 82   | 81   | 89   | 56   | 75   | 83       | 79      |                         |                             |
| Prevalence              | 2       | 57   | 49   | 33   | 0    | 0    | 11   | 36       | 23      | 2                        | 57   | 49   | 33   | 0    | 0    | 11   | 36       | 23      | 2                                | 57   | 49   | 33   | 0    | 0    | 11   | 36       | 23      |                         |                             |

Fig. S6. State-level results by quarter. Metrics are displayed on the left, with training data from Q2-Q4 2021 and test data from Q1-Q3 2022. Cells report weighted accuracy. Preferences for false positives versus false negatives vary across columns (with "neutral" corresponding to unweighted accuracy) and outcomes across rows. Prevalence indicates the population-weighted proportion of high location-weeks in a given quarter.





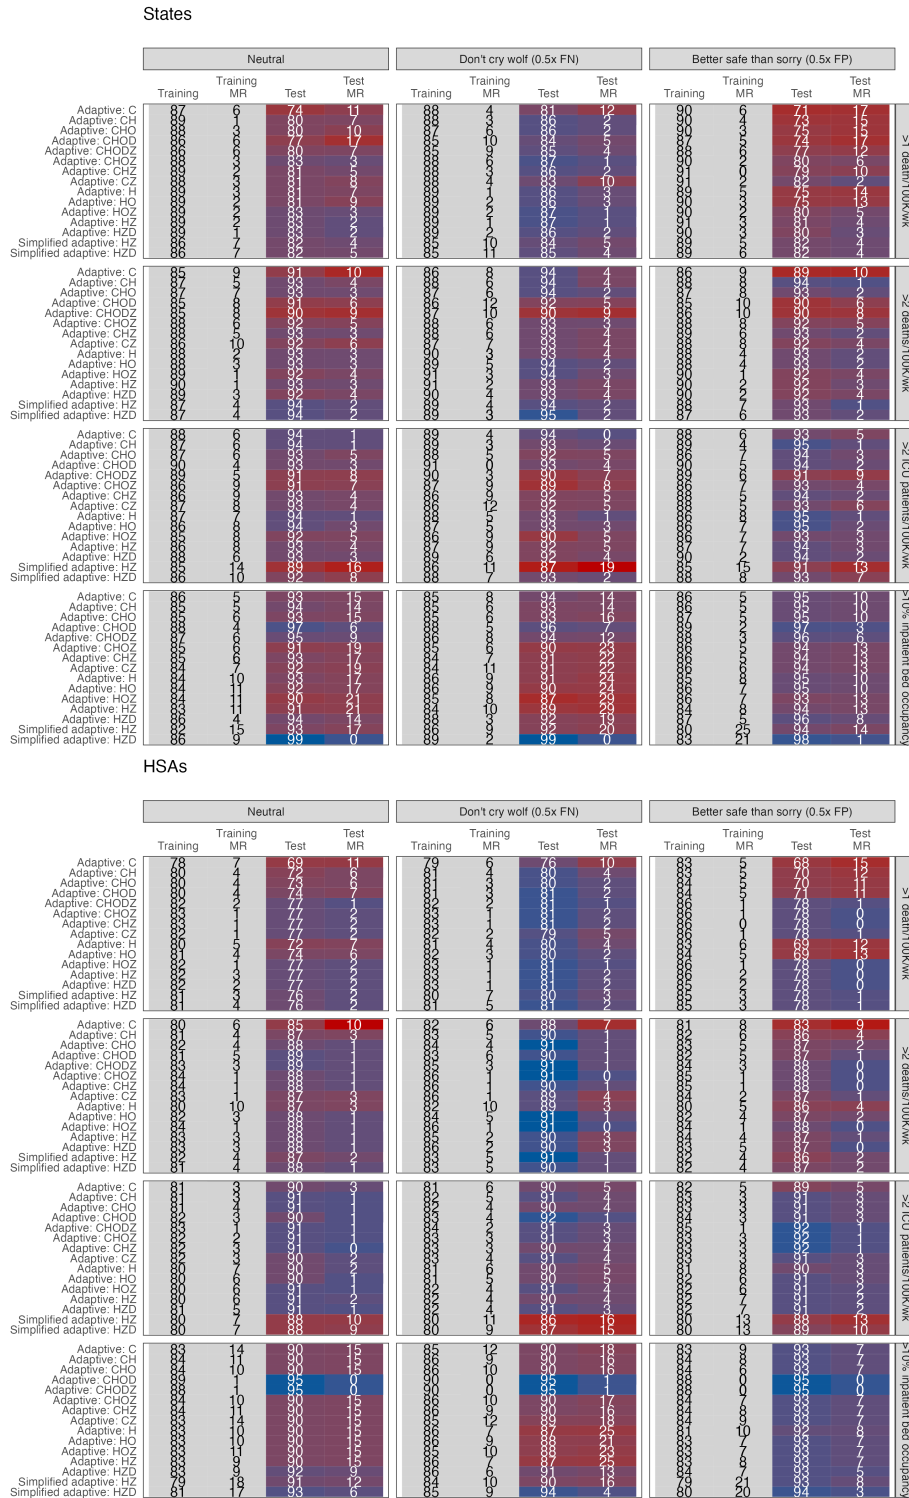

**Fig. S9.** Head-to-head comparison results with additional adaptive functional forms. The top plots display results from state-level analyses and middle from HSA-level analyses. Metrics are displayed on the left, with training data from Q2-Q4 2021 and test data from Q1-Q3 2022. Cells report weighted accuracy and maximum regret (MR) over training and test periods. Rows vary outcomes, and columns vary preferences for false positives versus false negatives, with "neutral" corresponding to unweighted accuracy. Prevalence indicates the population-weighted proportion of high location-weeks in a given time period. Performance is similar across adaptive specifications, but unusually low-performing specifications (e.g., C and CHOD for >1 death/100K/week) generally had low performance in both training and test periods.

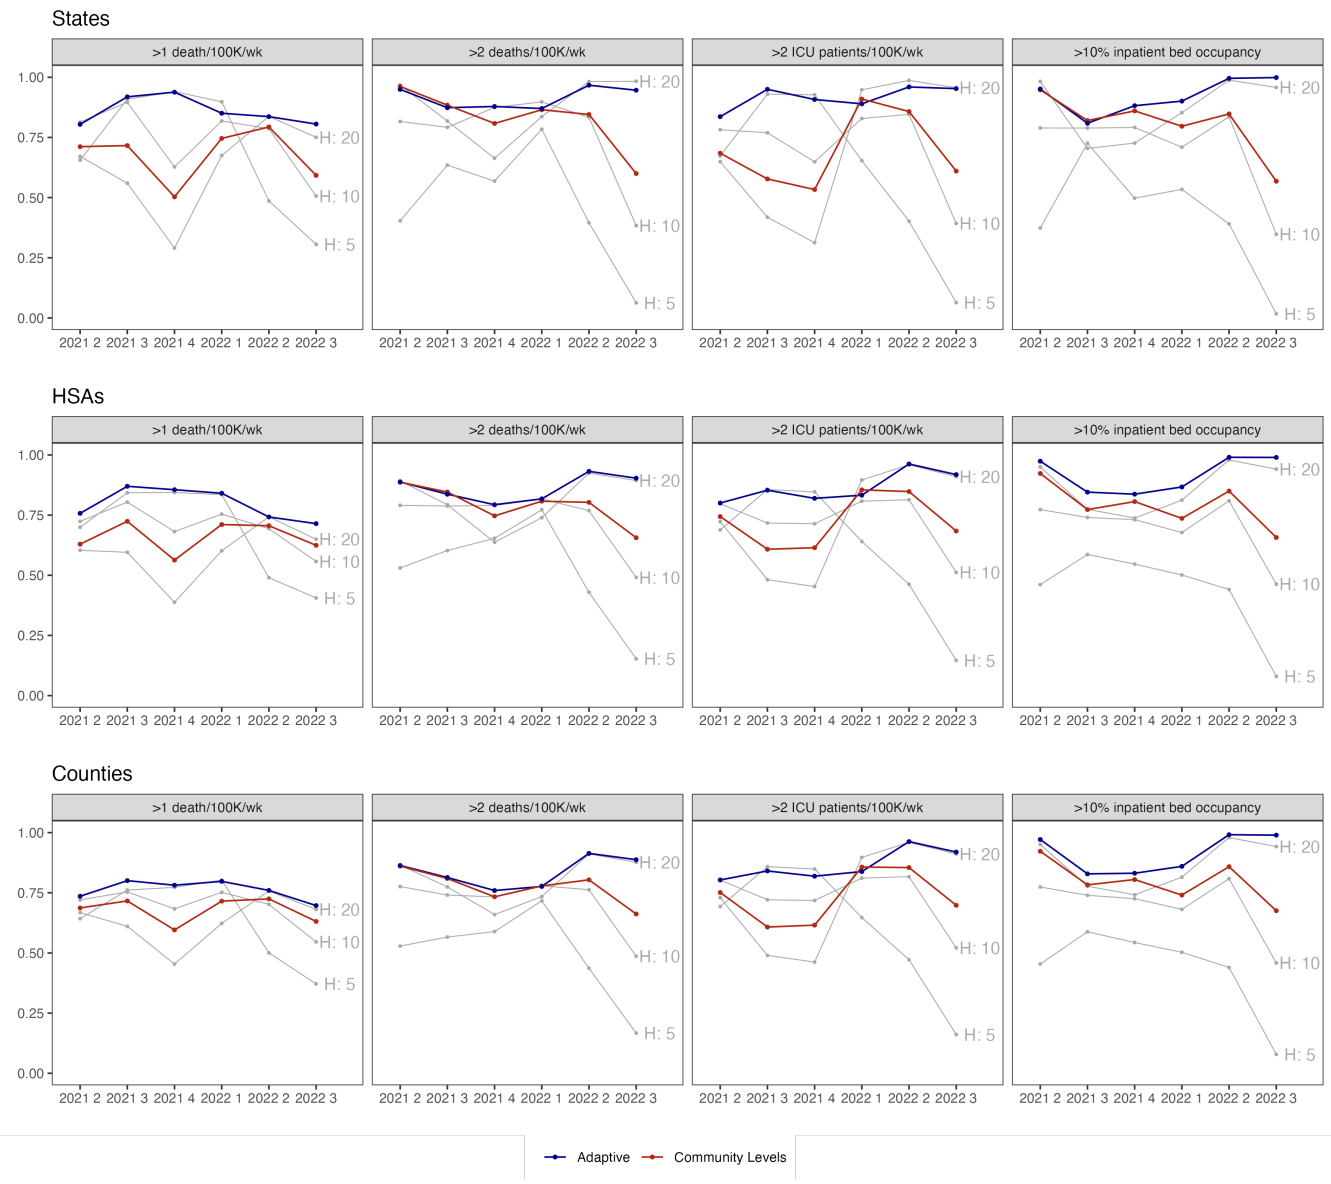

**Fig. S10.** Weighted accuracy by metric, including HSA-level results. Columns indicate different outcomes. The x-axis indicates quarter, and the y-axis predictive accuracy. Grey lines depict metrics based on new hospital admissions exceeding the labeled threshold. The red line indicates CDC Community Levels and the blue line the best-performing adaptive metric in the pre-intervention period of those listed in Figure S4.



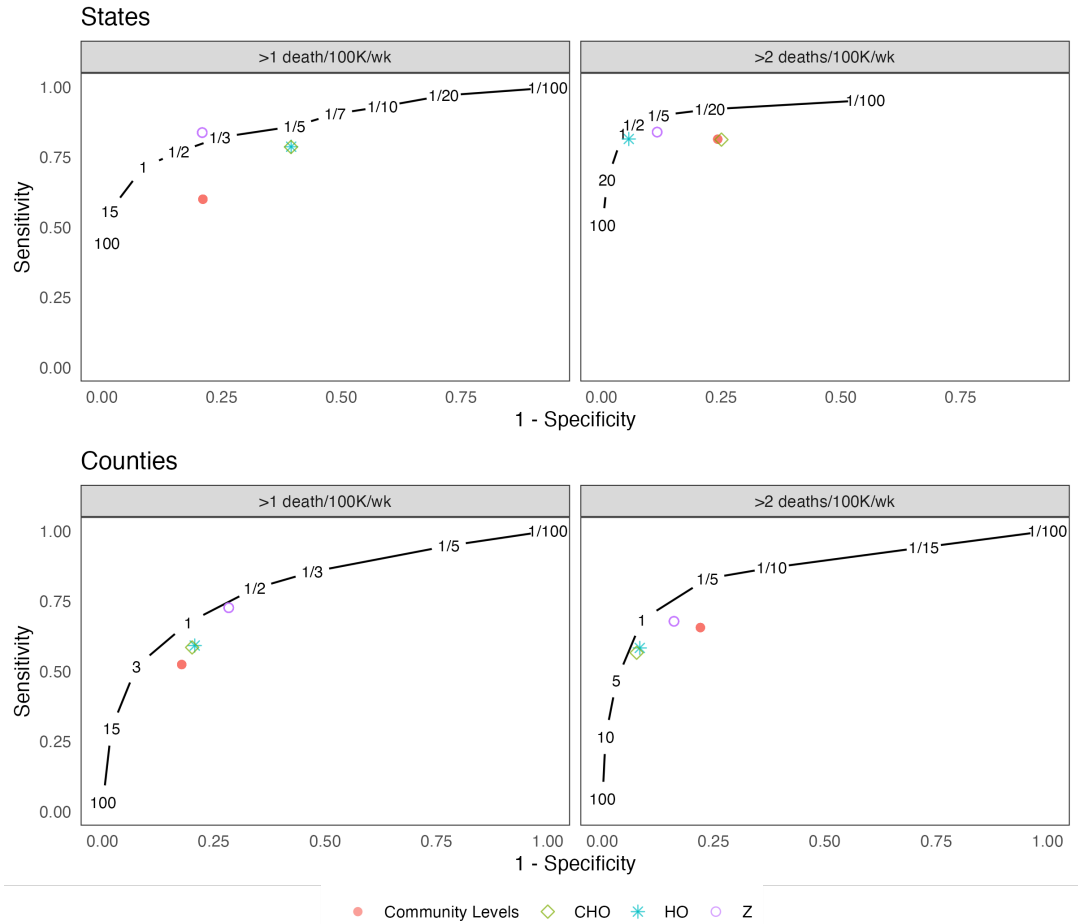

**Fig. S11.** Receiver operating characteristic (ROC) curves for the test period from January 1, 2022 to September 30, 2022. The black line indicates performance of the adaptive metric (HZ) across different values of  $w_t$ , indicating the relative preference for false negatives over false positives. The top plot indicates state results and the bottom plot county results.

States

|                         | Neutral       |             |      |         | Don't cry wolf (0.5x FN) |             |      |         | Better safe than sorry (0.5x FP) |             |      |         |  |
|-------------------------|---------------|-------------|------|---------|--------------------------|-------------|------|---------|----------------------------------|-------------|------|---------|--|
|                         | Training      | Training MR | Test | Test MR | Training                 | Training MR | Test | Test MR | Training                         | Training MR | Test | Test MR |  |
|                         | Adaptive: CHO | 97          | 4    | 77      | 10                       | 97          | 4    | 84      | 2                                | 98          | 2    | 70      |  |
| Adaptive: CHOZ          | 97            | 4           | 80   | 5       | 97                       | 5           | 85   | 2       | 98                               | 2           | 76   | 10      |  |
| Adaptive: CHOD          | 90            | 17          | 74   | 17      | 91                       | 13          | 82   | 4       | 88                               | 20          | 70   | 16      |  |
| Adaptive: HZ            | 98            | 3           | 80   | 5       | 98                       | 4           | 85   | 1       | 99                               | 2           | 77   | 8       |  |
| Simplified adaptive: HZ | 98            | 4           | 79   | 8       | 98                       | 3           | 82   | 5       | 99                               | 2           | 78   | 4       |  |
| Community Levels        | 92            | 20          | 66   | 24      | 95                       | 12          | 68   | 29      | 90                               | 26          | 64   | 24      |  |
| Z                       | 93            | 14          | 78   | 8       | 94                       | 11          | 76   | 12      | 91                               | 16          | 80   | 3       |  |
| CHO                     | 98            | 4           | 62   | 41      | 98                       | 2           | 57   | 58      | 98                               | 4           | 68   | 22      |  |
| HO                      | 98            | 4           | 62   | 41      | 98                       | 2           | 57   | 58      | 98                               | 4           | 68   | 22      |  |
| CH                      | 99            | 0           | 49   | 46      | 99                       | 0           | 37   | 67      | 99                               | 0           | 60   | 23      |  |
| H                       | 98            | 3           | 48   | 52      | 98                       | 4           | 33   | 77      | 99                               | 1           | 63   | 26      |  |
| C                       | 99            | 0           | 44   | 46      | 98                       | 0           | 31   | 67      | 99                               | 0           | 58   | 24      |  |
| Prevalence              | 98            |             | 31   |         | 98                       |             | 31   |         | 98                               |             | 31   |         |  |
| Adaptive: CHO           | 92            | 3           | 93   | 3       | 90                       | 9           | 94   | 2       | 94                               | 1           | 92   | 3       |  |
| Adaptive: CHOZ          | 92            | 3           | 91   | 3       | 91                       | 8           | 93   | 3       | 94                               | 1           | 90   | 5       |  |
| Adaptive: CHOD          | 92            | 3           | 90   | 4       | 92                       | 3           | 92   | 5       | 94                               | 0           | 89   | 6       |  |
| Adaptive: HZ            | 93            | 0           | 92   | 3       | 93                       | 0           | 93   | 4       | 94                               | 1           | 92   | 3       |  |
| Simplified adaptive: HZ | 92            | 2           | 94   | 0       | 92                       | 2           | 94   | 2       | 93                               | 2           | 93   | 1       |  |
| Community Levels        | 92            | 5           | 73   | 36      | 91                       | 9           | 68   | 51      | 93                               | 4           | 79   | 24      |  |
| Z                       | 78            | 18          | 88   | 19      | 82                       | 13          | 86   | 24      | 73                               | 25          | 91   | 15      |  |
| CHO                     | 93            | 1           | 71   | 49      | 94                       | 2           | 91   | 6       | 94                               | 0           | 78   | 33      |  |
| HO                      | 93            | 2           | 91   | 5       | 93                       | 0           | 91   | 10      | 94                               | 0           | 78   | 35      |  |
| CH                      | 93            | 2           | 90   | 6       | 94                       | 2           | 91   | 7       | 94                               | 1           | 75   | 35      |  |
| H                       | 93            | 2           | 90   | 6       | 93                       | 0           | 90   | 10      | 93                               | 2           | 76   | 38      |  |
| C                       | 92            | 6           | 65   | 39      | 91                       | 10          | 74   | 27      | 94                               | 1           | 63   | 42      |  |
| Prevalence              | 88            |             | 9    |         | 88                       |             | 9    |         | 88                               |             | 9    |         |  |

HSAs

|                         | Neutral       |             |      |         | Don't cry wolf (0.5x FN) |             |      |         | Better safe than sorry (0.5x FP) |             |      |         |  |
|-------------------------|---------------|-------------|------|---------|--------------------------|-------------|------|---------|----------------------------------|-------------|------|---------|--|
|                         | Training      | Training MR | Test | Test MR | Training                 | Training MR | Test | Test MR | Training                         | Training MR | Test | Test MR |  |
|                         | Adaptive: CHO | 95          | 2    | 69      | 6                        | 94          | 1    | 77      | 2                                | 96          | 1    | 65      |  |
| Adaptive: CHOZ          | 95            | 2           | 73   | 1       | 93                       | 2           | 78   | 2       | 96                               | 1           | 75   | 0       |  |
| Adaptive: CHOD          | 95            | 1           | 70   | 7       | 94                       | 1           | 78   | 2       | 96                               | 1           | 66   | 11      |  |
| Adaptive: HZ            | 95            | 0           | 73   | 0       | 94                       | 1           | 78   | 2       | 96                               | 0           | 75   | 0       |  |
| Simplified adaptive: HZ | 94            | 2           | 72   | 1       | 93                       | 3           | 77   | 3       | 96                               | 1           | 74   | 1       |  |
| Community Levels        | 89            | 15          | 63   | 13      | 92                       | 6           | 63   | 13      | 86                               | 26          | 57   | 27      |  |
| Z                       | 89            | 9           | 72   | 2       | 91                       | 6           | 70   | 12      | 87                               | 14          | 74   | 3       |  |
| CHO                     | 92            | 7           | 65   | 13      | 94                       | 1           | 69   | 18      | 91                               | 15          | 61   | 16      |  |
| HO                      | 92            | 7           | 65   | 13      | 94                       | 1           | 69   | 18      | 91                               | 15          | 61   | 16      |  |
| CH                      | 94            | 2           | 50   | 31      | 94                       | 0           | 44   | 47      | 95                               | 3           | 60   | 15      |  |
| H                       | 94            | 2           | 51   | 31      | 93                       | 1           | 40   | 55      | 95                               | 3           | 61   | 15      |  |
| C                       | 95            | 2           | 47   | 32      | 94                       | 1           | 37   | 54      | 96                               | 2           | 58   | 23      |  |
| Prevalence              | 94            |             | 39   |         | 94                       |             | 39   |         | 94                               |             | 39   |         |  |
| Adaptive: CHO           | 87            | 3           | 88   | 0       | 85                       | 3           | 91   | 1       | 90                               | 2           | 86   | 2       |  |
| Adaptive: CHOZ          | 88            | 2           | 88   | 0       | 86                       | 2           | 91   | 1       | 91                               | 0           | 87   | 0       |  |
| Adaptive: CHOD          | 87            | 2           | 88   | 0       | 86                       | 1           | 91   | 2       | 90                               | 1           | 86   | 1       |  |
| Adaptive: HZ            | 88            | 0           | 88   | 1       | 86                       | 1           | 90   | 4       | 90                               | 1           | 86   | 1       |  |
| Simplified adaptive: HZ | 85            | 8           | 87   | 2       | 85                       | 5           | 91   | 1       | 87                               | 10          | 85   | 2       |  |
| Community Levels        | 77            | 4           | 73   | 24      | 86                       | 3           | 70   | 37      | 88                               | 6           | 75   | 14      |  |
| Z                       | 87            | 10          | 83   | 11      | 81                       | 5           | 81   | 17      | 73                               | 17          | 85   | 9       |  |
| CHO                     | 87            | 3           | 78   | 21      | 85                       | 0           | 86   | 10      | 89                               | 3           | 77   | 17      |  |
| HO                      | 87            | 3           | 78   | 21      | 85                       | 0           | 86   | 10      | 89                               | 3           | 77   | 17      |  |
| CH                      | 87            | 2           | 66   | 40      | 85                       | 1           | 84   | 15      | 89                               | 4           | 58   | 41      |  |
| H                       | 87            | 3           | 65   | 41      | 85                       | 1           | 84   | 15      | 89                               | 3           | 72   | 24      |  |
| C                       | 86            | 7           | 49   | 52      | 85                       | 5           | 70   | 27      | 90                               | 3           | 54   | 42      |  |
| Prevalence              | 83            |             | 14   |         | 83                       |             | 14   |         | 83                               |             | 14   |         |  |

Counties

|                         | Neutral       |             |      |         | Don't cry wolf (0.5x FN) |             |      |         | Better safe than sorry (0.5x FP) |             |      |         |  |
|-------------------------|---------------|-------------|------|---------|--------------------------|-------------|------|---------|----------------------------------|-------------|------|---------|--|
|                         | Training      | Training MR | Test | Test MR | Training                 | Training MR | Test | Test MR | Training                         | Training MR | Test | Test MR |  |
|                         | Adaptive: CHO | 89          | 2    | 69      | 4                        | 87          | 0    | 77      | 4                                | 92          | 1    | 65      |  |
| Adaptive: CHOZ          | 89            | 1           | 72   | 0       | 88                       | 0           | 78   | 2       | 92                               | 1           | 72   | 1       |  |
| Adaptive: CHOD          | 89            | 2           | 71   | 2       | 88                       | 0           | 79   | 1       | 92                               | 1           | 66   | 6       |  |
| Adaptive: HZ            | 89            | 0           | 72   | 1       | 88                       | 0           | 78   | 3       | 93                               | 0           | 72   | 1       |  |
| Simplified adaptive: HZ | 88            | 4           | 70   | 4       | 87                       | 2           | 76   | 5       | 92                               | 1           | 71   | 1       |  |
| Community Levels        | 85            | 10          | 65   | 8       | 86                       | 3           | 70   | 15      | 85                               | 20          | 60   | 20      |  |
| Z                       | 83            | 6           | 70   | 4       | 85                       | 1           | 68   | 12      | 80                               | 13          | 71   | 5       |  |
| CHO                     | 88            | 3           | 66   | 9       | 87                       | 0           | 70   | 19      | 89                               | 10          | 63   | 12      |  |
| HO                      | 88            | 4           | 66   | 10      | 87                       | 0           | 69   | 21      | 89                               | 10          | 63   | 11      |  |
| CH                      | 89            | 1           | 52   | 26      | 87                       | 0           | 64   | 28      | 91                               | 3           | 61   | 13      |  |
| H                       | 89            | 2           | 49   | 33      | 87                       | 1           | 62   | 31      | 92                               | 2           | 61   | 13      |  |
| C                       | 89            | 1           | 48   | 32      | 87                       | 2           | 48   | 39      | 92                               | 1           | 57   | 21      |  |
| Prevalence              | 88            |             | 35   |         | 88                       |             | 35   |         | 88                               |             | 35   |         |  |
| Adaptive: CHO           | 80            | 3           | 86   | 1       | 77                       | 4           | 90   | 0       | 85                               | 1           | 83   | 3       |  |
| Adaptive: CHOZ          | 81            | 0           | 86   | 0       | 78                       | 1           | 90   | 1       | 85                               | 0           | 85   | 0       |  |
| Adaptive: CHOD          | 80            | 2           | 86   | 1       | 78                       | 1           | 90   | 0       | 86                               | 0           | 84   | 1       |  |
| Adaptive: HZ            | 80            | 3           | 86   | 2       | 78                       | 3           | 89   | 3       | 85                               | 0           | 84   | 2       |  |
| Simplified adaptive: HZ | 78            | 7           | 86   | 2       | 78                       | 2           | 90   | 0       | 82                               | 9           | 84   | 2       |  |
| Community Levels        | 80            | 2           | 73   | 23      | 77                       | 5           | 71   | 33      | 84                               | 3           | 75   | 13      |  |
| Z                       | 71            | 7           | 81   | 10      | 74                       | 4           | 79   | 15      | 67                               | 14          | 83   | 10      |  |
| CHO                     | 80            | 1           | 77   | 17      | 79                       | 0           | 87   | 6       | 85                               | 1           | 76   | 16      |  |
| HO                      | 80            | 1           | 77   | 21      | 78                       | 1           | 86   | 9       | 85                               | 1           | 76   | 16      |  |
| CH                      | 80            | 1           | 67   | 37      | 79                       | 1           | 86   | 8       | 84                               | 0           | 72   | 22      |  |
| H                       | 80            | 2           | 65   | 40      | 77                       | 3           | 83   | 14      | 84                               | 1           | 71   | 23      |  |
| C                       | 79            | 4           | 62   | 31      | 77                       | 5           | 79   | 15      | 84                               | 2           | 55   | 38      |  |
| Prevalence              | 75            |             | 15   |         | 75                       |             | 15   |         | 75                               |             | 15   |         |  |

Fig. S12. Head-to-head comparison results (omicron training set). The top plots display results from state-level analyses, middle from HSA-level analyses, and bottom from county-level analyses, all weighted for population. Metrics are displayed on the left, with training data from December 15, 2021-February 15, 2022 and test data from February 16-September 30, 2022. Cells report weighted accuracy and maximum regret (MR) over training and test periods. Rows vary outcomes, and columns vary preferences for false positives versus false negatives, with "neutral" corresponding to unweighted accuracy. Prevalence indicates the population-weighted proportion of high location-weeks in a given time period.

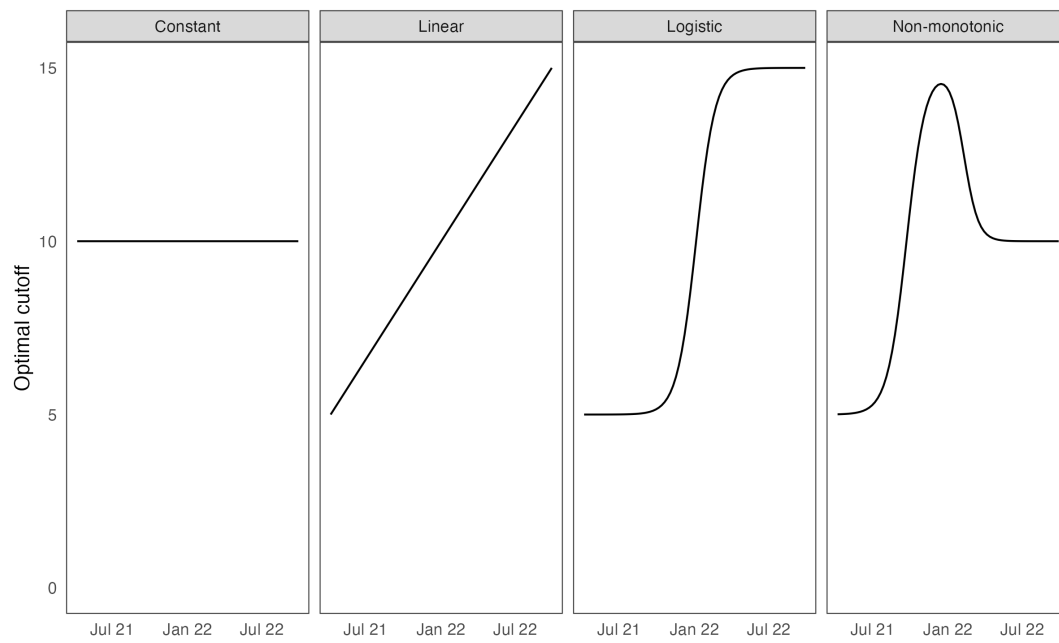

**Fig. S13.** Simulation scenarios. We vary the optimal cutoff for hospitalization to classify a location-week as "high" over time in different scenarios. The constant scenario assumes a static relationship between indicators and outcomes, while other scenarios assume a changing relationship.

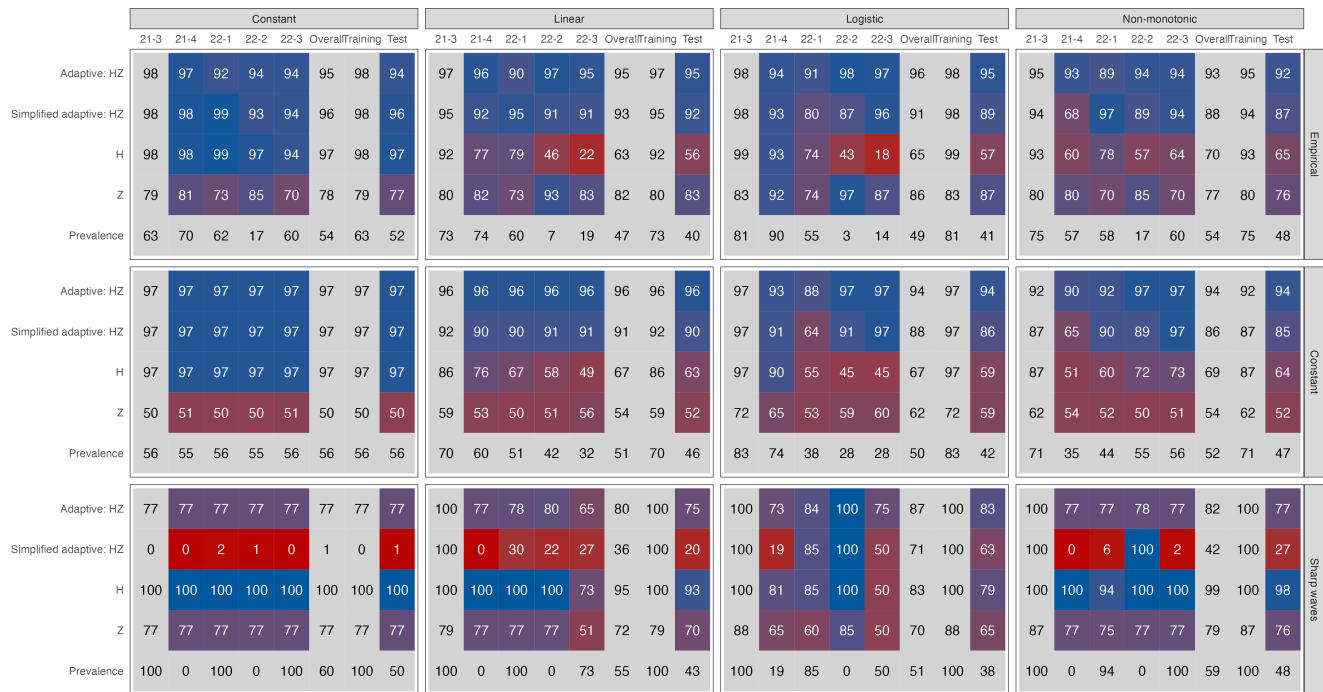

**Fig. S14.** Simulation results. Columns vary the relationship between the input indicator and outcome over time (Figure S13) and rows vary prevalence of hospitalizations and corresponding high outcomes. Metrics are varied in the y-axis, and 3-week-ahead predictive accuracy is displayed in cells.

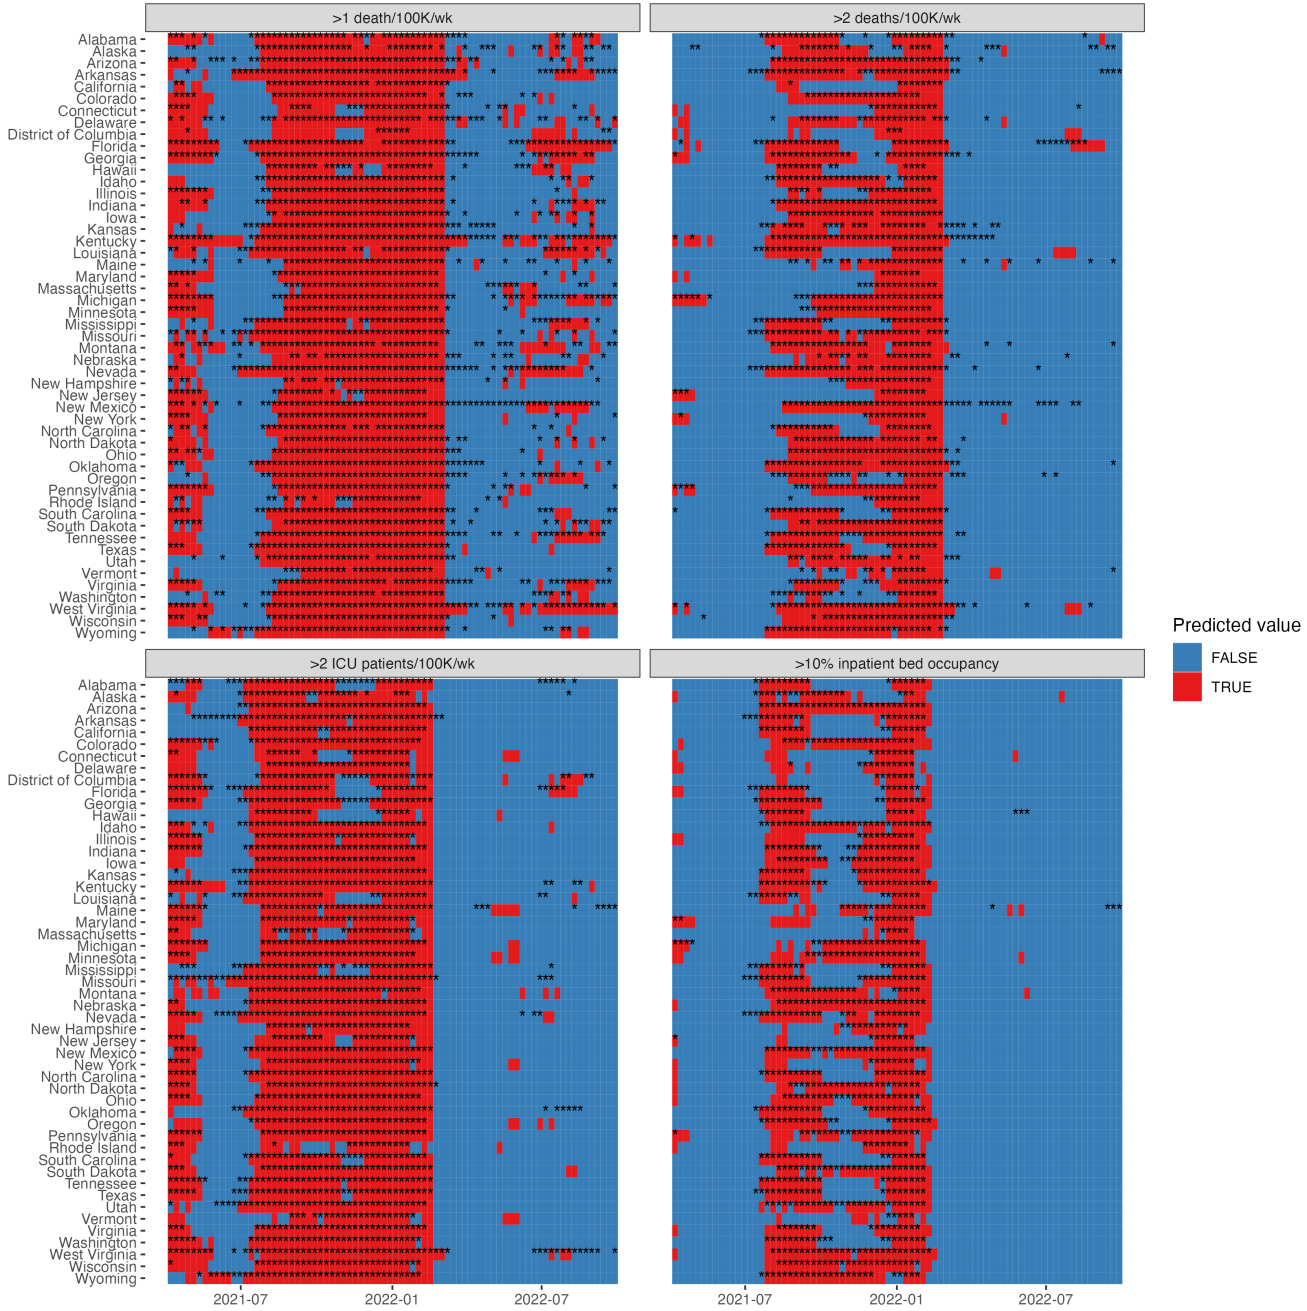

**Fig. S15.** Predicted and actual values of primary and secondary outcomes at the state level over time. Colors indicate predicted values, while asterisks indicate true values. Predictions are taken from the best-performing adaptive model in the training period, corresponding to those presented in Figure 4.
